# Supplementary material for: Polygamous breeding system identified in the distylous genus Psychotria: P. manillensis in the Ryukyu archipelago, Japan
Source: PeerJ. 2021 Nov 10;9:e12318. doi: 10.7717/peerj.12318 (PMC8590391; doi:10.7717/peerj.12318)
Supplement: Supplemental Information 8 [file peerj-09-12318-s008.xlsx]

## Sheet: RawDataMeta
csv_file/sheet_name	Description
B0	Fruit set after cross-pollination
B1	Fruit set after cross- and self-pollination
B2	Pollen tube penetration in stigmas after cross-polination
C1	Flower types in 2012
C2	Flower types in 2012 and 2013
D	Flower trait
F1	Fruit set under open pollination
F2	Fruit set after bagging experiments
F3	Fruit set in open and bag experiments in 2012
G	Flower_phenology
H	SexualShift
I	Femaleness (G) and fruit set

## Sheet: B0
ID	Type_stigma	tr	n_flower	n_fruit
1	A	cross	3	1
3	A	cross	7	4
56	A	cross	4	3
4	A	cross	5	5
6	A	cross	5	4
7	A	cross	5	2
8	A	cross	5	3
59	A	cross	3	3
12	A	cross	5	5
13	A	cross	5	5
14	A	cross	5	3
15	A	cross	5	2
16	A	cross	6	4
57	A	cross	6	5
24	A	cross	6	1
31	A	cross	5	4
32	A	cross	2	1
34	A	cross	3	1
37	A	cross	6	5
40	A	cross	6	1
42	A	cross	6	4
1	B	cross	5	1
4	B	cross	7	2
8	B	cross	5	1
14	B	cross	7	5
15	B	cross	5	3
16	B	cross	5	4
20	B	cross	7	4
22	B	cross	3	2
23	B	cross	7	7
25	B	cross	7	6
26	B	cross	4	2
27	B	cross	7	6
28	B	cross	5	4
29	B	cross	6	5
30	B	cross	5	3
32	B	cross	5	3
33	B	cross	7	5
41	B	cross	5	3
43	B	cross	4	3
57	B	cross	5	4
1	C	cross	2	0
3	C	cross	4	0
4	C	cross	3	0
5	C	cross	3	0
6	C	cross	6	0
7	C	cross	4	0
8	C	cross	5	0
9	C	cross	4	0
11	C	cross	6	0
13	C	cross	6	0
15	C	cross	2	0
16	C	cross	3	0
19	C	cross	3	0
20	C	cross	4	0
22	C	cross	7	1
35	C	cross	9	0
36	C	cross	6	0
38	C	cross	2	0
39	C	cross	7	0
44	C	cross	7	0
45	C	cross	3	1

## Sheet: B1
ID	Type_stigma	tr	n_flower	n_fruit
1	A	self	3	1
2	A	self	2	2
3	A	self	3	2
4	A	self	2	1
5	A	self	3	1
6	A	self	2	0
7	A	self	3	1
8	A	self	3	1
9	A	self	3	2
10	A	self	3	1
11	A	self	2	0
12	A	self	2	1
13	A	self	3	1
1	B	self	4	1
2	B	self	5	1
3	B	self	5	2
4	B	self	5	0
5	B	self	5	1
6	B	self	6	0
7	B	self	5	2
8	B	self	3	1
14	B	self	5	0
15	B	self	4	1
16	B	self	5	1
17	B	self	6	1
18	B	self	5	0
1	C	self	3	0
2	C	self	2	0
19	C	self	1	0
20	C	self	3	0
21	C	self	3	0
22	C	self	2	0
23	C	self	1	0
24	C	self	3	0
25	C	self	3	0
26	C	self	2	0
27	C	self	2	0
28	C	self	2	0
29	C	self	1	0
30	C	self	2	0
31	C	self	1	0
1	A	cross	3	1
3	A	cross	7	4
56	A	cross	4	3
4	A	cross	5	5
6	A	cross	5	4
7	A	cross	5	2
8	A	cross	5	3
59	A	cross	3	3
12	A	cross	5	5
13	A	cross	5	5
14	A	cross	5	3
15	A	cross	5	2
16	A	cross	6	4
57	A	cross	6	5
24	A	cross	6	1
31	A	cross	5	4
32	A	cross	2	1
34	A	cross	3	1
37	A	cross	6	5
40	A	cross	6	1
42	A	cross	6	4
1	B	cross	5	1
4	B	cross	7	2
8	B	cross	5	1
14	B	cross	7	5
15	B	cross	5	3
16	B	cross	5	4
20	B	cross	7	4
22	B	cross	3	2
23	B	cross	7	7
25	B	cross	7	6
26	B	cross	4	2
27	B	cross	7	6
28	B	cross	5	4
29	B	cross	6	5
30	B	cross	5	3
32	B	cross	5	3
33	B	cross	7	5
41	B	cross	5	3
43	B	cross	4	3
57	B	cross	5	4
1	C	cross	2	0
3	C	cross	4	0
4	C	cross	3	0
5	C	cross	3	0
6	C	cross	6	0
7	C	cross	4	0
8	C	cross	5	0
9	C	cross	4	0
11	C	cross	6	0
13	C	cross	6	0
15	C	cross	2	0
16	C	cross	3	0
19	C	cross	3	0
20	C	cross	4	0
22	C	cross	7	1
35	C	cross	9	0
36	C	cross	6	0
38	C	cross	2	0
39	C	cross	7	0
44	C	cross	7	0
45	C	cross	3	1

## Sheet: B2
ID	Type_stigma	treament	n_flower	n_fruit
1	A	cross	2	2
2	A	cross	2	2
3	A	cross	2	2
4	A	cross	3	3
5	A	cross	2	2
6	A	cross	2	2
7	A	cross	3	3
8	A	cross	2	2
9	A	cross	2	2
10	A	cross	2	2
1	B	cross	2	2
2	B	cross	2	2
3	B	cross	2	2
4	B	cross	1	1
5	B	cross	1	0
6	B	cross	2	2
11	B	cross	2	2
12	B	cross	1	1
13	B	cross	2	1
14	B	cross	2	1
1	C	cross	2	0
2	C	cross	2	0
3	C	cross	1	0
4	C	cross	2	0
5	C	cross	1	0
17	C	cross	2	0
18	C	cross	2	0
19	C	cross	2	0
20	C	cross	2	0
14	C	cross	2	0

## Sheet: C1
all_id	original_id	pop	Year	ID	female	male	perfect	sterile	unknown	total_n_flowers	relative_femaleness	gender
3	20	Su	2012	12	51	0	0	0	0	51	1	female
4	15	Su	2012	18	51	0	0	0	0	51	1	female
23	6	Su	2012	61	51	0	0	0	0	51	1	female
28	13	Su	2012	1180	60	0	0	0	0	60	1	female
31	1	Su	2012	1501	58	0	0	0	0	58	1	female
27	8	Su	2012	1171	0	0	67	0	0	67	0.5	hermaphrodite
7	12	Su	2012	22	0	50	0	0	0	50	0	male
8	2	Su	2012	24	0	69	0	0	0	69	0	male
9	3	Su	2012	26	0	63	0	0	0	63	0	male
17	5	Su	2012	54	0	55	0	0	0	55	0	male
26	7	Su	2012	1170	0	69	0	0	0	69	0	male
30	11	Su	2012	1231	0	64	0	0	0	64	0	male
33	18	Su	2012	1503	0	50	0	0	0	50	0	male
1	14	Su	2012	8	10	36	7	0	0	53	0.254717	monoecy
2	16	Su	2012	9	17	14	17	2	0	50	0.51	monoecy
13	21	Su	2012	41	3	46	2	0	0	51	0.0784314	monoecy
16	4	Su	2012	52	46	4	0	0	0	50	0.92	monoecy
29	9	Su	2012	1182	7	57	3	0	0	67	0.126866	monoecy
32	17	Su	2012	1502	0	59	4	0	0	63	0.031746	monoecy
34	19	Su	2012	1504	50	1	0	0	0	51	0.980392	monoecy
46	14	OP	2012	1	287	0	0	0	0	287	1	female
47	1	OP	2012	7	32	0	0	0	0	32	1	female
83	8	OP	2012	1452	51	0	0	0	0	51	1	female
87	9	OP	2012	1472	55	0	0	0	0	55	1	female
93	11	OP	2012	12-02	58	0	0	0	0	58	1	female
94	12	OP	2012	12-03	50	0	0	0	0	50	1	female
95	13	OP	2012	12-04	57	0	0	0	0	57	1	female
78	7	OP	2012	1302	0	67	0	0	0	67	0	male
48	21	OP	2012	8	92	35	3	0	0	130	0.719231	monoecy
51	22	OP	2012	14	176	76	32	0	2	286	0.671329	monoecy
54	2	OP	2012	33	36	23	10	0	0	69	0.594203	monoecy
55	3	OP	2012	35	60	4	2	0	0	66	0.924242	monoecy
61	6	OP	2012	45	49	1	0	0	0	50	0.98	monoecy
66	17	OP	2012	67	127	10	15	5	0	157	0.856688	monoecy
69	16	OP	2012	1125	369	8	17	2	0	396	0.953283	monoecy
70	15	OP	2012	1126	142	27	19	0	0	188	0.805851	monoecy
72	18	OP	2012	1133	222	58	11	1	1	293	0.776451	monoecy
73	20	OP	2012	1134	73	13	10	0	0	96	0.8125	monoecy
91	10	OP	2012	1510	53	1	5	0	0	59	0.940678	monoecy
96	23	OP	2012	12xx	31	37	16	1	0	85	0.458824	monoecy
104	11	KP	2012	1131	53	0	0	0	0	53	1	female
110	21	KP	2012	1549	50	0	0	0	0	50	1	female
114	2	KP	2012	12_01	70	0	0	0	0	70	1	female
120	8	KP	2012	12_07	60	0	0	0	0	60	1	female
121	9	KP	2012	12_08	59	0	0	0	0	59	1	female
122	10	KP	2012	12_09	63	0	0	0	0	63	1	female
123	13	KP	2012	12_10	50	0	0	0	0	50	1	female
125	15	KP	2012	12_12	50	0	0	0	0	50	1	female
126	16	KP	2012	12_13	76	0	0	0	0	76	1	female
127	17	KP	2012	12_14(1105)	0	50	0	0	0	50	0	male
130	19	KP	2012	12_17	0	57	0	0	0	57	0	male
101	1	KP	2012	1104	0	48	13	0	0	61	0.106557	monoecy
107	20	KP	2012	1543	30	6	18	0	0	54	0.722222	monoecy
115	3	KP	2012	12_02	3	70	13	0	0	86	0.110465	monoecy
116	4	KP	2012	12_03	4	49	9	1	0	63	0.134921	monoecy
117	5	KP	2012	12_04	8	45	6	0	0	59	0.186441	monoecy
118	6	KP	2012	12_05	2	70	0	0	0	72	0.0277778	monoecy
119	7	KP	2012	12_06	0	59	7	0	0	66	0.0530303	monoecy
129	18	KP	2012	12_16	4	11	35	0	0	50	0.43	monoecy
128	12	KP	2012	12_15(1105)	29	34	0	0	0	63	0.460317	monoecy
	1	IrUe	2012		52	0	0	0	0	52	1	female
	21	IrUe	2012		53	0	0	0	0	53	1	female
	15	IrUe	2012		0	51	0	0	0	51	0	male
	18	IrUe	2012		0	50	0	0	0	50	0	male
	22	IrUe	2012		0	62	0	0	0	62	0	male
	2	IrUe	2012		5	54	0	0	0	59	0.0847458	monoecy
	3	IrUe	2012		9	34	7	0	0	50	0.25	monoecy
	4	IrUe	2012		15	33	4	0	0	52	0.326923	monoecy
	6	IrUe	2012		38	10	2	1	0	51	0.764706	monoecy
	8	IrUe	2012		8	43	0	0	0	51	0.156863	monoecy
	9	IrUe	2012		2	48	0	0	0	50	0.04	monoecy
	11	IrUe	2012		4	50	0	0	0	54	0.0740741	monoecy
	13	IrUe	2012		39	12	0	0	0	51	0.764706	monoecy
	16	IrUe	2012		0	72	1	0	0	73	0.00684932	monoecy
	17	IrUe	2012		7	38	0	6	0	51	0.137255	monoecy
	23	IrUe	2012		32	15	0	0	0	47	0.680851	monoecy
	24	IrUe	2012		15	33	8	0	0	56	0.339286	monoecy
	25	IrUe	2012		10	51	5	0	0	66	0.189394	monoecy
	26	IrUe	2012		8	52	3	0	0	63	0.150794	monoecy
	27	IrUe	2012		28	22	6	0	0	56	0.553571	monoecy
150	2	IrSo	2012		50	0	0	0	0	50	1	female
158	12	IrSo	2012		54	0	0	0	0	54	1	female
160	14	IrSo	2012		53	0	0	0	0	53	1	female
161	15	IrSo	2012		62	0	0	0	0	62	1	female
163	17	IrSo	2012		51	0	0	0	0	51	1	female
165	20	IrSo	2012		55	0	0	0	0	55	1	female
168	32	IrSo	2012		50	0	0	0	0	50	1	female
157	11	IrSo	2012		0	0	50	0	0	50	0.5	hermaphrodite
169	33	IrSo	2012		0	52	0	0	0	52	0	male
999	34	IrSo	2012		0	50	0	0	0	50	0	male
149	1	IrSo	2012		6	39	6	0	0	51	0.176471	monoecy
151	4	IrSo	2012		30	15	7	0	6	58	0.577586	monoecy
153	7	IrSo	2012		30	13	6	1	0	50	0.66	monoecy
154	8	IrSo	2012		48	0	0	2	0	50	0.96	monoecy
155	9	IrSo	2012		36	7	6	1	0	50	0.78	monoecy
156	10	IrSo	2012		51	2	0	3	0	56	0.910714	monoecy
159	13	IrSo	2012		61	5	0	0	0	66	0.924242	monoecy
162	16	IrSo	2012		53	0	1	0	0	54	0.990741	monoecy
164	18	IrSo	2012		51	2	0	0	0	53	0.962264	monoecy
167	31	IrSo	2012		51	0	2	0	0	53	0.981132	monoecy

## Sheet: C2
all_id	original_id	pop	Year	ID	female	male	perfect	sterile	unknown	total_n_flowers	relative_femaleness	gender
3	20	Su	2012	12	51	0	0	0	0	51	1	female
4	15	Su	2012	18	51	0	0	0	0	51	1	female
23	6	Su	2012	61	51	0	0	0	0	51	1	female
28	13	Su	2012	1180	60	0	0	0	0	60	1	female
31	1	Su	2012	1501	58	0	0	0	0	58	1	female
27	8	Su	2012	1171	0	0	67	0	0	67	0.5	hermaphrodite
7	12	Su	2012	22	0	50	0	0	0	50	0	male
8	2	Su	2012	24	0	69	0	0	0	69	0	male
9	3	Su	2012	26	0	63	0	0	0	63	0	male
17	5	Su	2012	54	0	55	0	0	0	55	0	male
26	7	Su	2012	1170	0	69	0	0	0	69	0	male
30	11	Su	2012	1231	0	64	0	0	0	64	0	male
33	18	Su	2012	1503	0	50	0	0	0	50	0	male
1	14	Su	2012	8	10	36	7	0	0	53	0.254717	monoecy
2	16	Su	2012	9	17	14	17	2	0	50	0.51	monoecy
13	21	Su	2012	41	3	46	2	0	0	51	0.0784314	monoecy
16	4	Su	2012	52	46	4	0	0	0	50	0.92	monoecy
29	9	Su	2012	1182	7	57	3	0	0	67	0.126866	monoecy
32	17	Su	2012	1502	0	59	4	0	0	63	0.031746	monoecy
34	19	Su	2012	1504	50	1	0	0	0	51	0.980392	monoecy
46	14	OP	2012	1	287	0	0	0	0	287	1	female
47	1	OP	2012	7	32	0	0	0	0	32	1	female
83	8	OP	2012	1452	51	0	0	0	0	51	1	female
87	9	OP	2012	1472	55	0	0	0	0	55	1	female
93	11	OP	2012	12-02	58	0	0	0	0	58	1	female
94	12	OP	2012	12-03	50	0	0	0	0	50	1	female
95	13	OP	2012	12-04	57	0	0	0	0	57	1	female
78	7	OP	2012	1302	0	67	0	0	0	67	0	male
48	21	OP	2012	8	92	35	3	0	0	130	0.719231	monoecy
51	22	OP	2012	14	176	76	32	0	2	286	0.671329	monoecy
54	2	OP	2012	33	36	23	10	0	0	69	0.594203	monoecy
55	3	OP	2012	35	60	4	2	0	0	66	0.924242	monoecy
61	6	OP	2012	45	49	1	0	0	0	50	0.98	monoecy
66	17	OP	2012	67	127	10	15	5	0	157	0.856688	monoecy
69	16	OP	2012	1125	369	8	17	2	0	396	0.953283	monoecy
70	15	OP	2012	1126	142	27	19	0	0	188	0.805851	monoecy
72	18	OP	2012	1133	222	58	11	1	1	293	0.776451	monoecy
73	20	OP	2012	1134	73	13	10	0	0	96	0.8125	monoecy
91	10	OP	2012	1510	53	1	5	0	0	59	0.940678	monoecy
96	23	OP	2012	12xx	31	37	16	1	0	85	0.458824	monoecy
104	11	KP	2012	1131	53	0	0	0	0	53	1	female
110	21	KP	2012	1549	50	0	0	0	0	50	1	female
114	2	KP	2012	12_01	70	0	0	0	0	70	1	female
120	8	KP	2012	12_07	60	0	0	0	0	60	1	female
121	9	KP	2012	12_08	59	0	0	0	0	59	1	female
122	10	KP	2012	12_09	63	0	0	0	0	63	1	female
123	13	KP	2012	12_10	50	0	0	0	0	50	1	female
125	15	KP	2012	12_12	50	0	0	0	0	50	1	female
126	16	KP	2012	12_13	76	0	0	0	0	76	1	female
127	17	KP	2012	12_14(1105)	0	50	0	0	0	50	0	male
130	19	KP	2012	12_17	0	57	0	0	0	57	0	male
101	1	KP	2012	1104	0	48	13	0	0	61	0.106557	monoecy
107	20	KP	2012	1543	30	6	18	0	0	54	0.722222	monoecy
115	3	KP	2012	12_02	3	70	13	0	0	86	0.110465	monoecy
116	4	KP	2012	12_03	4	49	9	1	0	63	0.134921	monoecy
117	5	KP	2012	12_04	8	45	6	0	0	59	0.186441	monoecy
118	6	KP	2012	12_05	2	70	0	0	0	72	0.0277778	monoecy
119	7	KP	2012	12_06	0	59	7	0	0	66	0.0530303	monoecy
129	18	KP	2012	12_16	4	11	35	0	0	50	0.43	monoecy
128	12	KP	2012	12_15(1105)	29	34	0	0	0	63	0.460317	monoecy
170	1	IrUe	2012		52	0	0	0	0	52	1	female
171	21	IrUe	2012		53	0	0	0	0	53	1	female
172	15	IrUe	2012		0	51	0	0	0	51	0	male
173	18	IrUe	2012		0	50	0	0	0	50	0	male
174	22	IrUe	2012		0	62	0	0	0	62	0	male
175	2	IrUe	2012		5	54	0	0	0	59	0.0847458	monoecy
176	3	IrUe	2012		9	34	7	0	0	50	0.25	monoecy
177	4	IrUe	2012		15	33	4	0	0	52	0.326923	monoecy
178	6	IrUe	2012		38	10	2	1	0	51	0.764706	monoecy
179	8	IrUe	2012		8	43	0	0	0	51	0.156863	monoecy
180	9	IrUe	2012		2	48	0	0	0	50	0.04	monoecy
181	11	IrUe	2012		4	50	0	0	0	54	0.0740741	monoecy
182	13	IrUe	2012		39	12	0	0	0	51	0.764706	monoecy
183	16	IrUe	2012		0	72	1	0	0	73	0.00684932	monoecy
184	17	IrUe	2012		7	38	0	6	0	51	0.137255	monoecy
185	23	IrUe	2012		32	15	0	0	0	47	0.680851	monoecy
186	24	IrUe	2012		15	33	8	0	0	56	0.339286	monoecy
187	25	IrUe	2012		10	51	5	0	0	66	0.189394	monoecy
188	26	IrUe	2012		8	52	3	0	0	63	0.150794	monoecy
189	27	IrUe	2012		28	22	6	0	0	56	0.553571	monoecy
150	2	IrSo	2012		50	0	0	0	0	50	1	female
158	12	IrSo	2012		54	0	0	0	0	54	1	female
160	14	IrSo	2012		53	0	0	0	0	53	1	female
161	15	IrSo	2012		62	0	0	0	0	62	1	female
163	17	IrSo	2012		51	0	0	0	0	51	1	female
165	20	IrSo	2012		55	0	0	0	0	55	1	female
168	32	IrSo	2012		50	0	0	0	0	50	1	female
157	11	IrSo	2012		0	0	50	0	0	50	0.5	hermaphrodite
169	33	IrSo	2012		0	52	0	0	0	52	0	male
999	34	IrSo	2012		0	50	0	0	0	50	0	male
149	1	IrSo	2012		6	39	6	0	0	51	0.176471	monoecy
151	4	IrSo	2012		30	15	7	0	6	58	0.577586	monoecy
153	7	IrSo	2012		30	13	6	1	0	50	0.66	monoecy
154	8	IrSo	2012		48	0	0	2	0	50	0.96	monoecy
155	9	IrSo	2012		36	7	6	1	0	50	0.78	monoecy
156	10	IrSo	2012		51	2	0	3	0	56	0.910714	monoecy
159	13	IrSo	2012		61	5	0	0	0	66	0.924242	monoecy
162	16	IrSo	2012		53	0	1	0	0	54	0.990741	monoecy
164	18	IrSo	2012		51	2	0	0	0	53	0.962264	monoecy
167	31	IrSo	2012		51	0	2	0	0	53	0.981132	monoecy
46	14	OP	2013		87	0	0	0	0	87	1	female
47	1	OP	2013		145	0	2	0	0	147	0.993197	monoecy
48	21	OP	2013		46	28	32	0	0	106	0.584906	monoecy
51	22	OP	2013		68	4	6	0	0	78	0.910256	monoecy
54	2	OP	2013		33	2	0	0	0	35	0.942857	monoecy
55	3	OP	2013		54	0	0	0	0	54	1	female
58	4	OP	2013		57	0	0	0	0	57	1	female
59	5	OP	2013		7	0	0	0	0	7	1	female
61	6	OP	2013		83	0	8	0	0	91	0.956044	monoecy
66	17	OP	2013		71	0	1	0	0	72	0.993056	monoecy
69	16	OP	2013		106	10	5	0	0	121	0.896694	monoecy
70	15	OP	2013		133	20	0	0	0	153	0.869281	monoecy
72	18	OP	2013		123	1	3	0	0	127	0.980315	monoecy
73	20	OP	2013		118	4	0	0	0	122	0.967213	monoecy
75	19	OP	2013		98	0	0	0	0	98	1	female
77	7	OP	2013		61	0	1	0	0	62	0.991935	monoecy
82	8	OP	2013		34	0	0	0	0	34	1	female
86	9	OP	2013		56	3	0	0	0	59	0.949153	monoecy
94	12	OP	2013		96	0	0	0	0	96	1	female
95	13	OP	2013		66	0	0	0	0	66	1	female
96	23	OP	2013		24	0	5	0	0	29	0.913793	monoecy
97		OP	2013		35	0	0	0	0	35	1	female
1	1104	KP	2013		94	3	6	0	0	103	0.941748	monoecy
2	12_01	KP	2013		55	0	0	0	0	55	1	female
3	12_02	KP	2013		217	0	3	0	0	220	0.993182	monoecy
4	12_03	KP	2013		62	40	11	0	0	113	0.597345	monoecy
5	12_04	KP	2013		129	0	7	0	0	136	0.974265	monoecy
6	12_05	KP	2013		130	0	4	0	0	134	0.985075	monoecy
7	12_06	KP	2013		46	0	0	0	0	46	1	female
8	12_07	KP	2013		40	0	0	0	0	40	1	female
9	12_08	KP	2013		24	0	0	0	0	24	1	female
10	12_09	KP	2013		46	0	0	0	0	46	1	female
11	1131	KP	2013		89	0	0	0	0	89	1	female
12	12_15(1105)	KP	2013		149	0	0	0	0	149	1	female
13	12_10	KP	2013		50	0	0	0	0	50	1	female
14	12_11	KP	2013		59	0	0	0	0	59	1	female
15	12_12	KP	2013		92	0	0	0	0	92	1	female
16	12_13	KP	2013		38	0	0	0	0	38	1	female
17	12_14(1105)	KP	2013		0	26	0	0	0	26	0	male
20	1543(Bag162)	KP	2013		24	0	2	0	0	26	0.961538	monoecy
21	1130	KP	2013		5	19	41	0	0	65	0.392308	monoecy
22	1549	KP	2013		45	0	0	0	0	45	1	female
23	1301	KP	2013		14	32	2	0	0	48	0.3125	monoecy
24	28	KP	2013		26	0	0	0	0	26	1	female
25	30	KP	2013		30	11	0	0	0	41	0.731707	monoecy
26	1302	KP	2013		87	0	0	0	0	87	1	female
27	25	KP	2013		57	0	0	0	0	57	1	female
1	8	Su	2013		27	0	4	0	0	31	0.935484	monoecy
4	18	Su	2013		26	0	0	0	0	26	1	female
7	22	Su	2013		9	0	5	0	0	14	0.821429	monoecy
8	24	Su	2013		46	0	3	0	0	49	0.969388	monoecy
9	26	Su	2013		147	0	3	0	0	150	0.99	monoecy
13	41	Su	2013		102	1	5	0	0	108	0.967593	monoecy
15	52	Su	2013		94	0	0	0	0	94	1	female
17	54	Su	2013		35	13	3	0	0	51	0.715686	monoecy
23	61	Su	2013		26	0	0	0	0	26	1	female
35	1170	Su	2013		150	46	21	0	0	217	0.739631	monoecy
36	1171	Su	2013		105	8	8	0	0	121	0.900826	monoecy
37	1180	Su	2013		84	0	2	0	0	86	0.988372	monoecy
38	1182	Su	2013		91	1	2	4	0	98	0.938776	monoecy
39	1231	Su	2013		103	21	24	0	0	148	0.777027	monoecy
40	1501	Su	2013		78	0	0	1	0	79	0.987342	monoecy
41	1502	Su	2013		43	0	0	1	0	44	0.977273	monoecy
42	1503	Su	2013		93	0	0	0	0	93	1	female
43	1504	Su	2013		75	0	0	0	0	75	1	female
44	1601	Su	2013		24	29	9	0	0	62	0.459677	monoecy
45	1602	Su	2013		5	0	8	0	0	13	0.692308	monoecy

## Sheet: D
Plant_id	Figure_S2	Sexual_type_flower	Gender_of_plant	Anther-height(mm)	Stigma-height(mm)	Corolla-height(mm)	Corolla-width(mm)	Anther-length(mm)
1175	A	Female	Female	3.09	3.98	2.92	4.11	0.97
1175	A	Female	Female	2.97	4.01	3.04	4.25	1.25
1175	A	Female	Female	3.46	3.8	3.46	4.14	1.11
1175	A	Female	Female	3.11	3.88	2.98	4.09	0.87
1175	A	Female	Female	3.25	4.55	3.5	4.33	0.93
1175	A	Female	Female	3.23	4.46	3.25	3.48	1
1175	A	Female	Female	3.3	4.6	3.44	3.37	0.89
1175	A	Female	Female	3.34	4.35	3.53	4.01	0.88
1175	A	Female	Female	3.44	5.03	3.76	3.92	1.08
1175	A	Female	Female	3.02	4.14	3.09	3.46	1.09
1175	A	Female	Female	2.96	3.97	2.75	4.43	0.96
1175	A	Female	Female	3.29	4.4	3.51	4.22	0.98
1175	A	Female	Female	3.16	4.33	3.37	3.84	1
1175	A	Female	Female	3.1	4.23	2.75	4.55	0.94
1245	B	Male	Male	3.12	2.86	2.6	3.37	1.18
1245	B	Male	Male	3.45	2.36	2.87	3.24	1.39
1245	B	Male	Male	3.68	2.76	2.79	3.26	1.24
1245	B	Male	Male	3.18	2.27	2.07	3.35	1.26
1245	B	Male	Male	3.8	3.26	2.85	3.85	1.46
1245	B	Male	Male	3.85	2.8	3	3.37	1.42
1245	B	Male	Male	3.85	2.63	3.14	3.98	1.32
1245	B	Male	Male	3.87	2.98	3.25	4.15	1.58
1245	B	Male	Male	3.69	2.89	2.76	3.61	1.37
1245	B	Male	Male	3.38	2.42	2.69	3.53	1.55
1245	B	Male	Male	3.67	3	2.98	3.73	1.46
1245	B	Male	Male	3.67	2.32	3.05	3.87	1.37
23	C	Perfect	Hermaphrodite	4.16	4.83	4.14	4.86	1.44
23	C	Perfect	Hermaphrodite	4.53	4.74	4.22	3.95	1.09
23	C	Perfect	Hermaphrodite	3.61	4.19	3.7	4.15	1.02
23	C	Perfect	Hermaphrodite	3.73	4.51	3.56	4.21	0.92
23	C	Perfect	Hermaphrodite	3.61	4.48	3.93	4.24	1.01
23	C	Perfect	Hermaphrodite	4.02	4.71	3.82	4.17	0.89
23	C	Perfect	Hermaphrodite	4.13	4.98	3.86	4.43	1.16
23	C	Perfect	Hermaphrodite	3.85	4.34	3.05	3.58	1.11
23	C	Perfect	Hermaphrodite	4.31	4.74	4	3.79	1.44
23	C	Perfect	Hermaphrodite	4.27	4.27	4.06	4.27	1.12
23	C	Perfect	Hermaphrodite	3.75	4.34	3.67	3.99	1.27
23	C	Perfect	Hermaphrodite	3.45	3.76	3.28	3.61	1.18
1172	D	Female	Monoecious	2.67	3.68	2.76	3.62	0.9
1172	D	Female	Monoecious	2.49	3.44	2.34	3.76	0.82
1172	D	Female	Monoecious	3.03	4.01	2.8	3.63	0.91
1172	D	Female	Monoecious	3.02	3.9	3.06	4	1.2
1172	D	Female	Monoecious	3.19	4	3.24	3.92	0.8
1172	D	Female	Monoecious	2.57	3.55	2.25	3.51	0.75
1172	D	Female	Monoecious	2.9	3.6	2.7	3.75	0.7
1172	D	Female	Monoecious	2.85	3.5	2.67	3.51	1.05
1172	D	Female	Monoecious	3.05	3.79	3.04	3.19	1.02
1172	D	Female	Monoecious	3.04	3.42	2.7	3.54	0.65
1172	D	Female	Monoecious	3.14	3.59	2.98	3.59	0.81
1172	D	Perfect	Monoecious	3.34	3.63	3.12	3.41	1.24
1172	D	Perfect	Monoecious	2.77	3.31	2.63	3.23	1.06
1172	D	Perfect	Monoecious	2.61	3.18	2.65	3.03	0.73
1172	D	Perfect	Monoecious	3.57	3.57	3.15	4.29	1.02
1201	E	Perfect	Monoecious	3.77	4.56	3.77	3.97	0.86
1201	E	Perfect	Monoecious	2.9	3.67	3.26	3.34	0.75
1201	E	Female	Monoecious	3.18	4.07	2.75	3.75	0.87
1201	E	Female	Monoecious	3.03	4.13	3.03	3.77	0.84
1201	E	Female	Monoecious	3.21	3.57	2.62	3.97	1.06
1201	E	Male	Monoecious	3.47	3.63	3.18	4.83	1.03
1201	E	Male	Monoecious	4.17	4.46	3.26	3.97	1.33
1201	E	Male	Monoecious	3.7	3.76	3.71	3.47	1.1
1201	E	Male	Monoecious	3.33	4.36	3.38	3.58	1.12
1201	E	Male	Monoecious	3.31	4.2	3.12	3.22	0.82
1201	E	Male	Monoecious	4.31	4.48	3.78	3.76	1.14
1201	E	Male	Monoecious	4.51	4.78	3.53	3.47	1.37
1231	F	Male	Monoecious	4.04	3.09	3.34	3.51	1.14
1231	F	Male	Monoecious	4	2.97	2.75	3.77	1.26
1231	F	Male	Monoecious	3.83	2.64	3.11	3.4	1.24
1231	F	Female	Monoecious	2.83	3.49	2.97	3.71	0.92
1231	F	Female	Monoecious	2.86	3.94	2.69	3.21	0.88
1231	F	Female	Monoecious	2.58	3.49	2.67	3.63	0.71
1231	F	Female	Monoecious	2.98	3.61	2.73	3.24	0.85
1231	F	Female	Monoecious	2.28	2.95	2.28	3.35	0.93
1231	F	Female	Monoecious	2.71	3.24	2.65	3.33	0.8
1231	F	Female	Monoecious	2.53	3.36	2.51	3.31	0.78
1231	F	Perfect	Monoecious	3.37	3.2	2.97	4.27	1.04
1231	F	Perfect	Monoecious	3.13	3.41	2.72	3.11	0.97
1231	F	Perfect	Monoecious	3.19	3.99	2.85	3.51	1.13

## Sheet: F1
a_id	id	pop	year	treat	n_flower	n_fruit	non_fruit	fset
IrSo210	210	IrSo	2013	open	41	2	39	0.05
IrSo210	210	IrSo	2013	open	41	0	41	0
IrSo210	210	IrSo	2013	open	15	1	14	0.07
IrSo211	211	IrSo	2013	open	15	3	12	0.2
IrSo211	211	IrSo	2013	open	22	0	22	0
IrSo211	211	IrSo	2013	open	12	0	12	0
KP212	212	KP	2011	open	10	0	10	0
KP212	212	KP	2011	open	7	0	7	0
KP212	212	KP	2011	open	12	0	12	0
KP212	212	KP	2011	open	12	0	12	0
KP213	213	KP	2011	open	10	0	10	0
KP213	213	KP	2011	open	9	0	9	0
KP213	213	KP	2011	open	12	0	12	0
KP213	213	KP	2011	open	10	0	10	0
KP214	214	KP	2011	open	11	0	11	0
KP214	214	KP	2011	open	10	0	10	0
KP214	214	KP	2011	open	10	0	10	0
KP214	214	KP	2011	open	13	0	13	0
KP215	215	KP	2011	open	9	0	9	0
KP215	215	KP	2011	open	11	0	11	0
KP215	215	KP	2011	open	10	0	10	0
KP216	216	KP	2011	open	12	0	12	0
KP216	216	KP	2011	open	11	0	11	0
KP216	216	KP	2011	open	8	0	8	0
KP217	217	KP	2011	open	15	0	15	0
KP217	217	KP	2011	open	13	0	13	0
KP217	217	KP	2011	open	12	0	12	0
KP218	218	KP	2011	open	16	0	16	0
KP218	218	KP	2011	open	11	0	11	0
KP218	218	KP	2011	open	11	0	11	0
KP219	219	KP	2011	open	15	0	15	0
KP219	219	KP	2011	open	16	0	16	0
KP219	219	KP	2011	open	11	0	11	0
Su220	220	Su	2013	open	23	0	23	0
Su220	220	Su	2013	open	40	0	40	0
Su220	220	Su	2013	open	45	3	42	0.07
Su221	221	Su	2013	open	64	0	64	0
Su221	221	Su	2013	open	36	2	34	0.06
Su221	221	Su	2013	open	17	0	17	0
Su222	222	Su	2013	open	37	2	35	0.05
Su222	222	Su	2013	open	34	0	34	0
Su222	222	Su	2013	open	12	0	12	0
OP223	223	OP	2011	open	52	0	52	0
OP223	223	OP	2011	open	24	0	24	0
OP223	223	OP	2011	open	42	0	42	0
OP223	223	OP	2011	open	61	0	61	0
OP223	223	OP	2011	open	28	0	28	0
OP223	223	OP	2011	open	52	0	52	0
Su209	209	Su	2011	open	44	0	44	0
Su209	209	Su	2011	open	20	0	20	0
Su9	208	Su	2012	open	54	6	48	0.11
Su9	208	Su	2012	open	62	9	53	0.15
Su9	208	Su	2012	open	78	16	62	0.21
Su8	207	Su	2012	open	73	4	69	0.05
Su8	207	Su	2012	open	70	5	65	0.07
Su8	207	Su	2012	open	103	17	86	0.17
Su8	207	Su	2013	open	65	4	61	0.06
Su8	207	Su	2013	open	52	4	48	0.08
Su8	207	Su	2013	open	81	13	68	0.16
Su63	205	Su	2011	open	22	0	22	0
Su63	205	Su	2011	open	32	3	29	0.09
Su63	205	Su	2011	open	55	24	31	0.44
Su62	204	Su	2011	open	27	0	27	0
Su62	204	Su	2011	open	54	1	53	0.02
Su62	204	Su	2011	open	44	11	33	0.25
Su61	203	Su	2011	open	38	7	31	0.18
Su61	203	Su	2011	open	57	16	41	0.28
Su61	203	Su	2011	open	52	17	35	0.33
Su61	203	Su	2012	open	78	15	63	0.19
Su61	203	Su	2012	open	54	12	42	0.22
Su61	203	Su	2012	open	71	22	49	0.31
Su61	203	Su	2013	open	95	0	95	0
Su61	203	Su	2013	open	35	0	35	0
Su61	203	Su	2013	open	125	5	120	0.04
Su60	202	Su	2011	open	29	0	29	0
Su60	202	Su	2011	open	61	8	53	0.13
Su60	202	Su	2011	open	71	21	50	0.3
Su59	200	Su	2011	open	46	10	36	0.22
Su59	200	Su	2011	open	60	20	40	0.33
Su59	200	Su	2011	open	50	18	32	0.36
Su58	199	Su	2011	open	56	7	49	0.13
Su58	199	Su	2011	open	42	6	36	0.14
Su58	199	Su	2011	open	23	9	14	0.39
Su56	198	Su	2011	open	79	17	62	0.22
Su56	198	Su	2011	open	87	21	66	0.24
Su55	197	Su	2011	open	58	7	51	0.12
Su55	197	Su	2011	open	52	14	38	0.27
Su55	197	Su	2011	open	55	19	36	0.35
Su54	196	Su	2011	open	56	0	56	0
Su54	196	Su	2011	open	48	0	48	0
Su54	196	Su	2011	open	58	3	55	0.05
Su54	196	Su	2012	open	63	0	63	0
Su54	196	Su	2012	open	68	1	67	0.01
Su54	196	Su	2012	open	65	3	62	0.05
Su54	196	Su	2013	open	64	1	63	0.02
Su54	196	Su	2013	open	98	10	88	0.1
Su54	196	Su	2013	open	68	15	53	0.22
Su52	195	Su	2011	open	63	1	62	0.02
Su52	195	Su	2011	open	60	5	55	0.08
Su52	195	Su	2011	open	28	3	25	0.11
Su52	195	Su	2011	open	97	23	74	0.24
Su52	195	Su	2011	open	59	14	45	0.24
Su52	195	Su	2011	open	68	17	51	0.25
Su52	195	Su	2012	open	69	14	55	0.2
Su52	195	Su	2012	open	61	15	46	0.25
Su52	195	Su	2012	open	66	30	36	0.45
Su52	195	Su	2013	open	108	2	106	0.02
Su52	195	Su	2013	open	47	1	46	0.02
Su52	195	Su	2013	open	84	3	81	0.04
Su44	194	Su	2011	open	18	0	18	0
Su44	194	Su	2011	open	56	0	56	0
Su44	194	Su	2011	open	51	0	51	0
Su41	193	Su	2011	open	41	0	41	0
Su41	193	Su	2011	open	57	0	57	0
Su41	193	Su	2011	open	67	3	64	0.04
Su41	193	Su	2012	open	63	0	63	0
Su41	193	Su	2012	open	130	14	116	0.11
Su41	193	Su	2012	open	54	6	48	0.11
Su41	193	Su	2013	open	118	1	117	0.01
Su41	193	Su	2013	open	63	1	62	0.02
Su41	193	Su	2013	open	147	11	136	0.07
Su34	192	Su	2011	open	25	0	25	0
Su34	192	Su	2011	open	37	2	35	0.05
Su34	192	Su	2011	open	15	1	14	0.07
Su28	191	Su	2011	open	41	0	41	0
Su28	191	Su	2011	open	71	0	71	0
Su28	191	Su	2011	open	45	0	45	0
Su27	190	Su	2011	open	26	0	26	0
Su27	190	Su	2011	open	57	3	54	0.05
Su26	189	Su	2011	open	30	0	30	0
Su26	189	Su	2011	open	55	3	52	0.05
Su26	189	Su	2011	open	99	3	96	0.03
Su26	189	Su	2012	open	51	0	51	0
Su26	189	Su	2012	open	70	0	70	0
Su26	189	Su	2012	open	49	0	49	0
Su26	189	Su	2013	open	88	2	86	0.02
Su26	189	Su	2013	open	98	5	93	0.05
Su26	189	Su	2013	open	97	6	91	0.06
Su24	188	Su	2012	open	33	0	33	0
Su24	188	Su	2012	open	34	0	34	0
Su24	188	Su	2012	open	82	1	81	0.01
Su24	188	Su	2013	open	97	0	97	0
Su24	188	Su	2013	open	65	0	65	0
Su24	188	Su	2013	open	62	2	60	0.03
Su22	187	Su	2012	open	32	0	32	0
Su22	187	Su	2012	open	47	4	43	0.09
Su22	187	Su	2012	open	53	5	48	0.09
Su22	187	Su	2013	open	73	0	73	0
Su22	187	Su	2013	open	51	0	51	0
Su22	187	Su	2013	open	69	1	68	0.01
Su20	186	Su	2011	open	49	2	47	0.04
Su20	186	Su	2011	open	92	8	84	0.09
Su20	186	Su	2011	open	67	8	59	0.12
Su19	185	Su	2011	open	72	0	72	0
Su19	185	Su	2011	open	70	1	69	0.01
Su19	185	Su	2011	open	34	1	33	0.03
Su18	184	Su	2011	open	73	6	67	0.08
Su18	184	Su	2011	open	64	10	54	0.16
Su18	184	Su	2011	open	75	18	57	0.24
Su18	184	Su	2012	open	59	23	36	0.39
Su18	184	Su	2012	open	55	29	26	0.53
Su18	184	Su	2012	open	25	15	10	0.6
Su18	184	Su	2013	open	36	0	36	0
Su18	184	Su	2013	open	48	0	48	0
Su18	184	Su	2013	open	134	4	130	0.03
Su1602	183	Su	2013	open	98	0	98	0
Su1602	183	Su	2013	open	89	13	76	0.15
Su1602	183	Su	2013	open	88	25	63	0.28
Su1601	182	Su	2013	open	64	4	60	0.06
Su1601	182	Su	2013	open	74	6	68	0.08
Su1601	182	Su	2013	open	57	6	51	0.11
Su1504	181	Su	2012	open	60	24	36	0.4
Su1504	181	Su	2012	open	81	34	47	0.42
Su1504	181	Su	2012	open	94	56	38	0.6
Su1504	181	Su	2013	open	26	0	26	0
Su1504	181	Su	2013	open	64	8	56	0.13
Su1504	181	Su	2013	open	62	13	49	0.21
Su1503	180	Su	2012	open	65	0	65	0
Su1503	180	Su	2012	open	57	0	57	0
Su1503	180	Su	2012	open	68	2	66	0.03
Su1503	180	Su	2013	open	89	8	81	0.09
Su1503	180	Su	2013	open	100	19	81	0.19
Su1503	180	Su	2013	open	111	13	98	0.12
Su1502	179	Su	2012	open	67	0	67	0
Su1502	179	Su	2012	open	62	1	61	0.02
Su1502	179	Su	2012	open	53	1	52	0.02
Su1502	179	Su	2013	open	52	0	52	0
Su1502	179	Su	2013	open	48	0	48	0
Su1502	179	Su	2013	open	46	0	46	0
Su1501	178	Su	2012	open	73	12	61	0.16
Su1501	178	Su	2012	open	76	18	58	0.24
Su1501	178	Su	2012	open	86	24	62	0.28
Su1501	178	Su	2013	open	81	0	81	0
Su1501	178	Su	2013	open	89	14	75	0.16
Su1501	178	Su	2013	open	49	9	40	0.18
Su1231	175	Su	2012	open	20	0	20	0
Su1231	175	Su	2012	open	130	0	130	0
Su1231	175	Su	2012	open	106	0	106	0
Su1231	175	Su	2013	open	84	1	83	0.01
Su1231	175	Su	2013	open	125	2	123	0.02
Su1231	175	Su	2013	open	146	7	139	0.05
Su12	174	Su	2012	open	153	25	128	0.16
Su12	174	Su	2012	open	137	28	109	0.2
Su12	174	Su	2012	open	42	26	16	0.62
Su1182	173	Su	2012	open	69	8	61	0.12
Su1182	173	Su	2012	open	68	8	60	0.12
Su1182	173	Su	2012	open	51	12	39	0.24
Su1182	173	Su	2013	open	80	0	80	0
Su1182	173	Su	2013	open	122	2	120	0.02
Su1182	173	Su	2013	open	63	3	60	0.05
Su1180	172	Su	2012	open	42	20	22	0.48
Su1180	172	Su	2012	open	77	45	32	0.58
Su1180	172	Su	2012	open	49	37	12	0.76
Su1180	172	Su	2013	open	100	1	99	0.01
Su1180	172	Su	2013	open	81	1	80	0.01
Su1180	172	Su	2013	open	46	1	45	0.02
Su1171	171	Su	2012	open	49	0	49	0
Su1171	171	Su	2012	open	43	0	43	0
Su1171	171	Su	2012	open	60	10	50	0.17
Su1171	171	Su	2013	open	64	10	54	0.16
Su1171	171	Su	2013	open	60	24	36	0.4
Su1171	171	Su	2013	open	43	11	32	0.26
Su1170	170	Su	2012	open	81	0	81	0
Su1170	170	Su	2012	open	86	0	86	0
Su1170	170	Su	2012	open	89	0	89	0
Su1170	170	Su	2013	open	122	7	115	0.06
Su1170	170	Su	2013	open	87	28	59	0.32
Su1170	170	Su	2013	open	78	17	61	0.22
OP9	164	OP	2011	open	63	11	52	0.17
OP9	164	OP	2011	open	39	11	28	0.28
OP9	164	OP	2011	open	42	21	21	0.5
OP8	163	OP	2012	open	50	1	49	0.02
OP8	163	OP	2012	open	32	5	27	0.16
OP8	163	OP	2012	open	26	2	24	0.08
OP8	163	OP	2013	open	128	8	120	0.06
OP8	163	OP	2013	open	142	13	129	0.09
OP8	163	OP	2013	open	166	21	145	0.13
OP7	162	OP	2011	open	21	0	21	0
OP7	162	OP	2011	open	60	8	52	0.13
OP7	162	OP	2011	open	26	7	19	0.27
OP7	162	OP	2012	open	154	26	128	0.17
OP7	162	OP	2012	open	117	16	101	0.14
OP7	162	OP	2012	open	61	14	47	0.23
OP7	162	OP	2013	open	79	0	79	0
OP7	162	OP	2013	open	135	0	135	0
OP7	162	OP	2013	open	88	1	87	0.01
OP67	161	OP	2012	open	63	0	63	0
OP67	161	OP	2012	open	52	3	49	0.06
OP67	161	OP	2012	open	78	2	76	0.03
OP67	161	OP	2013	open	78	3	75	0.04
OP67	161	OP	2013	open	99	10	89	0.1
OP67	161	OP	2013	open	96	17	79	0.18
OP51	160	OP	2011	open	42	7	35	0.17
OP51	160	OP	2011	open	47	12	35	0.26
OP51	160	OP	2011	open	51	27	24	0.53
OP49	158	OP	2011	open	32	2	30	0.06
OP49	158	OP	2011	open	52	5	47	0.1
OP48	157	OP	2011	open	36	2	34	0.06
OP48	157	OP	2011	open	37	4	33	0.11
OP46	156	OP	2011	open	37	0	37	0
OP46	156	OP	2011	open	50	2	48	0.04
OP46	156	OP	2011	open	57	9	48	0.16
OP45	155	OP	2012	open	54	21	33	0.39
OP45	155	OP	2012	open	70	32	38	0.46
OP45	155	OP	2012	open	67	0	67	0
OP45	155	OP	2013	open	122	0	122	0
OP45	155	OP	2013	open	88	1	87	0.01
OP45	155	OP	2013	open	89	2	87	0.02
OP43	154	OP	2011	open	40	3	37	0.08
OP43	154	OP	2011	open	46	6	40	0.13
OP43	154	OP	2011	open	66	10	56	0.15
OP42	153	OP	2012	open	56	4	52	0.07
OP42	153	OP	2012	open	61	10	51	0.16
OP42	153	OP	2012	open	52	0	52	0
OP42	153	OP	2013	open	86	0	86	0
OP42	153	OP	2013	open	69	0	69	0
OP42	153	OP	2013	open	121	6	115	0.05
OP41	152	OP	2012	open	45	9	36	0.2
OP41	152	OP	2012	open	62	6	56	0.1
OP41	152	OP	2012	open	58	1	57	0.02
OP41	152	OP	2013	open	50	0	50	0
OP41	152	OP	2013	open	61	1	60	0.02
OP41	152	OP	2013	open	173	4	169	0.02
OP39	150	OP	2011	open	50	3	47	0.06
OP39	150	OP	2011	open	45	4	41	0.09
OP39	150	OP	2011	open	60	11	49	0.18
OP37	149	OP	2011	open	61	10	51	0.16
OP37	149	OP	2011	open	42	7	35	0.17
OP37	149	OP	2011	open	44	11	33	0.25
OP35	148	OP	2012	open	31	10	21	0.32
OP35	148	OP	2012	open	87	1	86	0.01
OP35	148	OP	2012	open	71	2	69	0.03
OP35	148	OP	2013	open	46	0	46	0
OP35	148	OP	2013	open	71	2	69	0.03
OP35	148	OP	2013	open	96	4	92	0.04
OP33	147	OP	2012	open	36	0	36	0
OP33	147	OP	2012	open	49	0	49	0
OP33	147	OP	2012	open	65	0	65	0
OP33	147	OP	2013	open	63	0	63	0
OP33	147	OP	2013	open	87	2	85	0.02
OP33	147	OP	2013	open	99	4	95	0.04
OP20	144	OP	2011	open	32	9	23	0.28
OP20	144	OP	2011	open	48	14	34	0.29
OP20	144	OP	2011	open	60	18	42	0.3
OP18	141	OP	2011	open	41	0	41	0
OP18	141	OP	2011	open	41	0	41	0
OP18	141	OP	2011	open	35	3	32	0.09
OP1602	139	OP	2011	open	26	0	26	0
OP1602	139	OP	2011	open	49	15	34	0.31
OP1602	139	OP	2011	open	30	11	19	0.37
OP1510	138	OP	2012	open	70	12	58	0.17
OP1510	138	OP	2012	open	43	2	41	0.05
OP1510	138	OP	2012	open	78	3	75	0.04
OP1475	137	OP	2011	open	67	5	62	0.07
OP1475	137	OP	2011	open	64	5	59	0.08
OP1475	137	OP	2011	open	54	13	41	0.24
OP1474	136	OP	2011	open	27	8	19	0.3
OP1474	136	OP	2011	open	38	22	16	0.58
OP1474	136	OP	2011	open	35	22	13	0.63
OP1474	136	OP	2013	open	72	0	72	0
OP1474	136	OP	2013	open	76	0	76	0
OP1474	136	OP	2013	open	78	2	76	0.03
OP1473	135	OP	2011	open	50	15	35	0.3
OP1473	135	OP	2011	open	39	12	27	0.31
OP1472	134	OP	2011	open	54	13	41	0.24
OP1472	134	OP	2011	open	48	12	36	0.25
OP1472	134	OP	2011	open	35	19	16	0.54
OP1472	134	OP	2012	open	41	1	40	0.02
OP1472	134	OP	2012	open	30	9	21	0.3
OP1472	134	OP	2012	open	29	0	29	0
OP1472	134	OP	2013	open	86	5	81	0.06
OP1472	134	OP	2013	open	132	18	114	0.14
OP1472	134	OP	2013	open	116	20	96	0.17
OP1471	133	OP	2011	open	39	1	38	0.03
OP1471	133	OP	2011	open	43	5	38	0.12
OP1471	133	OP	2011	open	65	18	47	0.28
OP1452	132	OP	2011	open	42	5	37	0.12
OP1452	132	OP	2011	open	43	7	36	0.16
OP1452	132	OP	2011	open	49	13	36	0.27
OP1452	132	OP	2012	open	34	0	34	0
OP1452	132	OP	2012	open	12	0	12	0
OP1452	132	OP	2012	open	57	9	48	0.16
OP1452	132	OP	2013	open	99	0	99	0
OP1452	132	OP	2013	open	118	3	115	0.03
OP1452	132	OP	2013	open	67	4	63	0.06
OP1450	131	OP	2011	open	64	2	62	0.03
OP1407	130	OP	2011	open	39	0	39	0
OP1407	130	OP	2011	open	89	13	76	0.15
OP1407	130	OP	2011	open	43	9	34	0.21
OP14	129	OP	2012	open	35	4	31	0.11
OP14	129	OP	2012	open	44	2	42	0.05
OP14	129	OP	2012	open	64	0	64	0
OP14	129	OP	2013	open	91	0	91	0
OP14	129	OP	2013	open	208	1	207	0
OP14	129	OP	2013	open	125	3	122	0.02
OP1306	128	OP	2011	open	50	8	42	0.16
OP1306	128	OP	2011	open	54	13	41	0.24
OP1306	128	OP	2011	open	55	20	35	0.36
OP1305	127	OP	2011	open	35	2	33	0.06
OP1305	127	OP	2011	open	39	6	33	0.15
OP1305	127	OP	2011	open	68	13	55	0.19
OP1302	126	OP	2012	open	78	1	77	0.01
OP1302	126	OP	2012	open	114	3	111	0.03
OP1302	126	OP	2012	open	57	2	55	0.04
OP1302	126	OP	2013	open	116	0	116	0
OP1302	126	OP	2013	open	68	1	67	0.01
OP1302	126	OP	2013	open	96	6	90	0.06
OP12xx	123	OP	2012	open	34	0	34	0
OP12xx	123	OP	2012	open	45	0	45	0
OP12xx	123	OP	2012	open	31	8	23	0.26
OP12xx	123	OP	2013	open	83	0	83	0
OP12xx	123	OP	2013	open	142	0	142	0
OP12xx	123	OP	2013	open	113	0	113	0
OP1245	122	OP	2011	open	71	5	66	0.07
OP1245	122	OP	2011	open	40	6	34	0.15
OP1244	121	OP	2011	open	20	5	15	0.25
OP1244	121	OP	2011	open	54	20	34	0.37
OP1244	121	OP	2011	open	53	28	25	0.53
OP1244	121	OP	2012	open	54	7	47	0.13
OP1244	121	OP	2012	open	96	16	80	0.17
OP1244	121	OP	2012	open	67	2	65	0.03
OP1244	121	OP	2013	open	87	0	87	0
OP1244	121	OP	2013	open	111	0	111	0
OP1244	121	OP	2013	open	111	1	110	0.01
OP1243	120	OP	2011	open	64	21	43	0.33
OP1243	120	OP	2011	open	50	18	32	0.36
OP1243	120	OP	2011	open	51	23	28	0.45
OP12-04	119	OP	2012	open	48	8	40	0.17
OP12-04	119	OP	2012	open	65	15	50	0.23
OP12-04	119	OP	2012	open	44	2	42	0.05
OP12-04	119	OP	2013	open	71	2	69	0.03
OP12-04	119	OP	2013	open	135	6	129	0.04
OP12-04	119	OP	2013	open	78	9	69	0.12
OP12-03	118	OP	2012	open	23	5	18	0.22
OP12-03	118	OP	2012	open	42	3	39	0.07
OP12-03	118	OP	2012	open	33	9	24	0.27
OP12-03	118	OP	2013	open	87	2	85	0.02
OP12-03	118	OP	2013	open	129	8	121	0.06
OP12-03	118	OP	2013	open	89	9	80	0.1
OP12-02	117	OP	2012	open	49	2	47	0.04
OP12-02	117	OP	2012	open	52	0	52	0
OP12-02	117	OP	2012	open	63	3	60	0.05
OP1134	115	OP	2011	open	55	9	46	0.16
OP1134	115	OP	2011	open	50	13	37	0.26
OP1134	115	OP	2011	open	62	22	40	0.35
OP1134	115	OP	2012	open	81	0	81	0
OP1134	115	OP	2012	open	94	1	93	0.01
OP1134	115	OP	2012	open	80	1	79	0.01
OP1134	115	OP	2013	open	76	0	76	0
OP1134	115	OP	2013	open	82	1	81	0.01
OP1134	115	OP	2013	open	98	5	93	0.05
OP1133	114	OP	2011	open	39	4	35	0.1
OP1133	114	OP	2011	open	45	6	39	0.13
OP1133	114	OP	2011	open	51	9	42	0.18
OP1133	114	OP	2011	open	44	8	36	0.18
OP1133	114	OP	2011	open	58	14	44	0.24
OP1133	114	OP	2011	open	68	23	45	0.34
OP1133	114	OP	2012	open	60	11	49	0.18
OP1133	114	OP	2012	open	84	5	79	0.06
OP1133	114	OP	2012	open	77	1	76	0.01
OP1133	114	OP	2013	open	58	0	58	0
OP1133	114	OP	2013	open	70	1	69	0.01
OP1133	114	OP	2013	open	39	1	38	0.03
OP1132	113	OP	2011	open	53	13	40	0.25
OP1132	113	OP	2011	open	43	11	32	0.26
OP1132	113	OP	2011	open	54	18	36	0.33
OP1126	112	OP	2012	open	37	2	35	0.05
OP1126	112	OP	2012	open	38	0	38	0
OP1126	112	OP	2012	open	59	0	59	0
OP1126	112	OP	2013	open	51	2	49	0.04
OP1126	112	OP	2013	open	94	4	90	0.04
OP1126	112	OP	2013	open	121	7	114	0.06
OP1125	111	OP	2012	open	53	0	53	0
OP1125	111	OP	2012	open	28	0	28	0
OP1125	111	OP	2012	open	29	0	29	0
OP1125	111	OP	2013	open	132	0	132	0
OP1125	111	OP	2013	open	92	2	90	0.02
OP1125	111	OP	2013	open	82	15	67	0.18
OP1120	110	OP	2011	open	35	6	29	0.17
OP1120	110	OP	2011	open	69	20	49	0.29
OP1120	110	OP	2011	open	62	18	44	0.29
OP1109	109	OP	2011	open	39	1	38	0.03
OP1109	109	OP	2011	open	65	2	63	0.03
OP1109	109	OP	2011	open	57	17	40	0.3
OP10	107	OP	2011	open	44	5	39	0.11
OP10	107	OP	2011	open	35	4	31	0.11
OP10	107	OP	2011	open	37	6	31	0.16
OP1	106	OP	2011	open	36	6	30	0.17
OP1	106	OP	2011	open	54	11	43	0.2
OP1	106	OP	2011	open	66	18	48	0.27
OP1	106	OP	2012	open	45	3	42	0.07
OP1	106	OP	2012	open	57	4	53	0.07
OP1	106	OP	2012	open	45	0	45	0
OP1	106	OP	2013	open	74	7	67	0.09
OP1	106	OP	2013	open	101	11	90	0.11
OP1	106	OP	2013	open	84	38	46	0.45
KP30	103	KP	2011	open	28	0	28	0
KP30	103	KP	2011	open	24	0	24	0
KP30	103	KP	2011	open	28	1	27	0.04
KP30	103	KP	2013	open	107	2	105	0.02
KP30	103	KP	2013	open	110	14	96	0.13
KP30	103	KP	2013	open	113	15	98	0.13
KP28	101	KP	2013	open	126	19	107	0.15
KP28	101	KP	2013	open	104	19	85	0.18
KP28	101	KP	2013	open	73	19	54	0.26
KP25	100	KP	2011	open	123	22	101	0.18
KP25	100	KP	2011	open	70	13	57	0.19
KP25	100	KP	2011	open	65	17	48	0.26
KP25	100	KP	2013	open	159	24	135	0.15
KP25	100	KP	2013	open	225	37	188	0.16
KP25	100	KP	2013	open	104	27	77	0.26
KP1552	93	KP	2011	open	45	0	45	0
KP1552	93	KP	2011	open	45	0	45	0
KP1551	92	KP	2011	open	36	15	21	0.42
KP1551	92	KP	2011	open	83	40	43	0.48
KP1550	91	KP	2011	open	54	1	53	0.02
KP1550	91	KP	2011	open	105	34	71	0.32
KP1550	91	KP	2011	open	48	25	23	0.52
KP1549	90	KP	2012	open	196	0	196	0
KP1549	90	KP	2012	open	75	0	75	0
KP1549	90	KP	2012	open	123	21	102	0.17
KP1549	90	KP	2013	open	189	6	183	0.03
KP1549	90	KP	2013	open	161	33	128	0.2
KP1549	90	KP	2013	open	116	26	90	0.22
KP1545	89	KP	2011	open	134	42	92	0.31
KP1545	89	KP	2011	open	49	25	24	0.51
KP1545	89	KP	2011	open	73	39	34	0.53
KP1544	88	KP	2011	open	41	0	41	0
KP1544	88	KP	2011	open	81	0	81	0
KP1544	88	KP	2011	open	72	0	72	0
KP1543(Bag162)	87	KP	2013	open	92	1	91	0.01
KP1543(Bag162)	87	KP	2013	open	63	8	55	0.13
KP1543(Bag162)	87	KP	2013	open	86	13	73	0.15
KP1543	86	KP	2012	open	80	0	80	0
KP1543	86	KP	2012	open	123	2	121	0.02
KP1302	85	KP	2013	open	184	0	184	0
KP1302	85	KP	2013	open	114	11	103	0.1
KP1302	85	KP	2013	open	110	23	87	0.21
KP1301	84	KP	2013	open	89	0	89	0
KP1301	84	KP	2013	open	87	1	86	0.01
KP1301	84	KP	2013	open	120	15	105	0.13
KP12_17	83	KP	2012	open	282	0	282	0
KP12_17	83	KP	2012	open	83	8	75	0.1
KP12_17	83	KP	2012	open	188	32	156	0.17
KP12_16	82	KP	2012	open	88	0	88	0
KP12_16	82	KP	2012	open	60	5	55	0.08
KP12_16	82	KP	2012	open	86	17	69	0.2
KP12_15(1105)	81	KP	2012	open	55	0	55	0
KP12_15(1105)	81	KP	2012	open	99	8	91	0.08
KP12_15(1105)	81	KP	2012	open	108	13	95	0.12
KP12_15(1105)	81	KP	2013	open	96	14	82	0.15
KP12_15(1105)	81	KP	2013	open	210	51	159	0.24
KP12_15(1105)	81	KP	2013	open	130	73	57	0.56
KP12_14(1105)	80	KP	2012	open	128	0	128	0
KP12_14(1105)	80	KP	2012	open	80	1	79	0.01
KP12_14(1105)	80	KP	2012	open	93	5	88	0.05
KP12_14(1105)	80	KP	2013	open	59	1	58	0.02
KP12_14(1105)	80	KP	2013	open	93	4	89	0.04
KP12_14(1105)	80	KP	2013	open	119	14	105	0.12
KP12_13	79	KP	2012	open	60	0	60	0
KP12_13	79	KP	2012	open	109	0	109	0
KP12_13	79	KP	2012	open	71	0	71	0
KP12_13	79	KP	2013	open	92	3	89	0.03
KP12_13	79	KP	2013	open	83	9	74	0.11
KP12_13	79	KP	2013	open	168	29	139	0.17
KP12_12	78	KP	2012	open	107	0	107	0
KP12_12	78	KP	2012	open	119	1	118	0.01
KP12_12	78	KP	2012	open	105	4	101	0.04
KP12_12	78	KP	2013	open	157	21	136	0.13
KP12_12	78	KP	2013	open	117	21	96	0.18
KP12_12	78	KP	2013	open	148	46	102	0.31
KP12_11	77	KP	2012	open	87	0	87	0
KP12_11	77	KP	2012	open	109	8	101	0.07
KP12_11	77	KP	2013	open	155	13	142	0.08
KP12_11	77	KP	2013	open	209	18	191	0.09
KP12_11	77	KP	2013	open	111	15	96	0.14
KP12_10	76	KP	2012	open	67	0	67	0
KP12_10	76	KP	2012	open	76	4	72	0.05
KP12_10	76	KP	2012	open	85	15	70	0.18
KP12_10	76	KP	2013	open	55	3	52	0.05
KP12_10	76	KP	2013	open	184	15	169	0.08
KP12_10	76	KP	2013	open	91	9	82	0.1
KP12_09	75	KP	2012	open	104	0	104	0
KP12_09	75	KP	2012	open	54	2	52	0.04
KP12_09	75	KP	2012	open	138	6	132	0.04
KP12_09	75	KP	2013	open	95	0	95	0
KP12_09	75	KP	2013	open	88	7	81	0.08
KP12_09	75	KP	2013	open	103	10	93	0.1
KP12_08	74	KP	2012	open	93	1	92	0.01
KP12_08	74	KP	2012	open	120	7	113	0.06
KP12_08	74	KP	2012	open	89	7	82	0.08
KP12_08	74	KP	2013	open	79	2	77	0.03
KP12_08	74	KP	2013	open	116	4	112	0.03
KP12_08	74	KP	2013	open	114	8	106	0.07
KP12_07	73	KP	2012	open	131	1	130	0.01
KP12_07	73	KP	2012	open	79	2	77	0.03
KP12_07	73	KP	2012	open	33	6	27	0.18
KP12_07	73	KP	2013	open	67	2	65	0.03
KP12_07	73	KP	2013	open	113	5	108	0.04
KP12_07	73	KP	2013	open	112	10	102	0.09
KP12_06	72	KP	2012	open	110	3	107	0.03
KP12_06	72	KP	2012	open	109	4	105	0.04
KP12_06	72	KP	2012	open	66	12	54	0.18
KP12_06	72	KP	2013	open	71	0	71	0
KP12_06	72	KP	2013	open	90	6	84	0.07
KP12_06	72	KP	2013	open	82	8	74	0.1
KP12_05	71	KP	2012	open	92	0	92	0
KP12_05	71	KP	2012	open	95	15	80	0.16
KP12_05	71	KP	2013	open	121	0	121	0
KP12_05	71	KP	2013	open	133	0	133	0
KP12_05	71	KP	2013	open	124	0	124	0
KP12_04	70	KP	2012	open	113	0	113	0
KP12_04	70	KP	2012	open	152	1	151	0.01
KP12_04	70	KP	2012	open	130	17	113	0.13
KP12_04	70	KP	2013	open	93	6	87	0.06
KP12_04	70	KP	2013	open	88	8	80	0.09
KP12_04	70	KP	2013	open	103	13	90	0.13
KP12_03	69	KP	2012	open	121	0	121	0
KP12_03	69	KP	2012	open	159	6	153	0.04
KP12_03	69	KP	2012	open	167	55	112	0.33
KP12_03	69	KP	2013	open	121	5	116	0.04
KP12_03	69	KP	2013	open	204	10	194	0.05
KP12_03	69	KP	2013	open	161	13	148	0.08
KP12_02	68	KP	2012	open	68	0	68	0
KP12_02	68	KP	2012	open	135	0	135	0
KP12_02	68	KP	2012	open	85	4	81	0.05
KP12_02	68	KP	2013	open	172	24	148	0.14
KP12_02	68	KP	2013	open	192	29	163	0.15
KP12_02	68	KP	2013	open	147	32	115	0.22
KP12_01	67	KP	2012	open	97	0	97	0
KP12_01	67	KP	2012	open	250	0	250	0
KP12_01	67	KP	2012	open	113	0	113	0
KP12_01	67	KP	2013	open	84	0	84	0
KP12_01	67	KP	2013	open	134	5	129	0.04
KP12_01	67	KP	2013	open	108	8	100	0.07
KP1131	65	KP	2011	open	51	15	36	0.29
KP1131	65	KP	2011	open	48	27	21	0.56
KP1131	65	KP	2012	open	47	3	44	0.06
KP1131	65	KP	2012	open	53	12	41	0.23
KP1131	65	KP	2013	open	142	8	134	0.06
KP1131	65	KP	2013	open	97	14	83	0.14
KP1131	65	KP	2013	open	133	48	85	0.36
KP1130	64	KP	2012	open	110	0	110	0
KP1130	64	KP	2012	open	54	2	52	0.04
KP1130	64	KP	2013	open	192	7	185	0.04
KP1130	64	KP	2013	open	118	11	107	0.09
KP1130	64	KP	2013	open	164	36	128	0.22
KP1105	63	KP	2011	open	109	33	76	0.3
KP1105	63	KP	2011	open	61	23	38	0.38
KP1105	63	KP	2011	open	48	28	20	0.58
KP1104	62	KP	2012	open	64	8	56	0.13
KP1104	62	KP	2013	open	103	1	102	0.01
KP1104	62	KP	2013	open	105	39	66	0.37
KP1104	62	KP	2013	open	83	39	44	0.47
KP	60	KP	2012	open	163	1	162	0.01
KP	60	KP	2012	open	82	8	74	0.1
IrUe9	59	IrUe	2012	open	36	0	36	0
IrUe9	59	IrUe	2012	open	36	0	36	0
IrUe9	59	IrUe	2012	open	17	0	17	0
IrUe9	59	IrUe	2013	open	59	0	59	0
IrUe9	59	IrUe	2013	open	60	0	60	0
IrUe9	59	IrUe	2013	open	45	0	45	0
IrUe8	58	IrUe	2012	open	35	0	35	0
IrUe8	58	IrUe	2012	open	19	0	19	0
IrUe8	58	IrUe	2012	open	25	0	25	0
IrUe8	58	IrUe	2013	open	42	1	41	0.02
IrUe8	58	IrUe	2013	open	40	1	39	0.03
IrUe8	58	IrUe	2013	open	37	3	34	0.08
IrUe6＊	57	IrUe	2012	open	67	0	67	0
IrUe6＊	57	IrUe	2012	open	47	0	47	0
IrUe6＊	57	IrUe	2012	open	40	0	40	0
IrUe6＊	57	IrUe	2013	open	39	0	39	0
IrUe6＊	57	IrUe	2013	open	36	0	36	0
IrUe6＊	57	IrUe	2013	open	26	1	25	0.04
IrUe5	56	IrUe	2012	open	51	0	51	0
IrUe5	56	IrUe	2012	open	46	6	40	0.13
IrUe5	56	IrUe	2012	open	28	5	23	0.18
IrUe4	55	IrUe	2012	open	74	0	74	0
IrUe4	55	IrUe	2012	open	56	0	56	0
IrUe4	55	IrUe	2012	open	81	0	81	0
IrUe32	54	IrUe	2013	open	49	0	49	0
IrUe32	54	IrUe	2013	open	34	0	34	0
IrUe31	53	IrUe	2013	open	58	0	58	0
IrUe31	53	IrUe	2013	open	47	0	47	0
IrUe31	53	IrUe	2013	open	30	2	28	0.07
IrUe3	52	IrUe	2012	open	54	0	54	0
IrUe3	52	IrUe	2012	open	56	0	56	0
IrUe3	52	IrUe	2012	open	33	2	31	0.06
IrUe2	51	IrUe	2012	open	38	0	38	0
IrUe2	51	IrUe	2012	open	57	0	57	0
IrUe2	51	IrUe	2012	open	53	0	53	0
IrUe2	51	IrUe	2013	open	27	0	27	0
IrUe2	51	IrUe	2013	open	38	0	38	0
IrUe2	51	IrUe	2013	open	29	0	29	0
IrUe18	50	IrUe	2012	open	17	0	17	0
IrUe18	50	IrUe	2012	open	39	0	39	0
IrUe18	50	IrUe	2012	open	40	0	40	0
IrUe18	50	IrUe	2013	open	61	0	61	0
IrUe18	50	IrUe	2013	open	50	0	50	0
IrUe18	50	IrUe	2013	open	57	0	57	0
IrUe17	49	IrUe	2012	open	55	0	55	0
IrUe17	49	IrUe	2012	open	51	0	51	0
IrUe17	49	IrUe	2012	open	94	4	90	0.04
IrUe17	49	IrUe	2013	open	61	0	61	0
IrUe17	49	IrUe	2013	open	61	0	61	0
IrUe17	49	IrUe	2013	open	67	0	67	0
IrUe16	48	IrUe	2012	open	52	0	52	0
IrUe16	48	IrUe	2012	open	77	0	77	0
IrUe16	48	IrUe	2012	open	45	0	45	0
IrUe16	48	IrUe	2013	open	64	0	64	0
IrUe16	48	IrUe	2013	open	52	0	52	0
IrUe16	48	IrUe	2013	open	70	4	66	0.06
IrUe15	47	IrUe	2012	open	100	0	100	0
IrUe15	47	IrUe	2012	open	108	0	108	0
IrUe15	47	IrUe	2012	open	59	0	59	0
IrUe15	47	IrUe	2013	open	52	0	52	0
IrUe15	47	IrUe	2013	open	112	0	112	0
IrUe15	47	IrUe	2013	open	119	1	118	0.01
IrUe13	46	IrUe	2012	open	27	0	27	0
IrUe13	46	IrUe	2012	open	38	1	37	0.03
IrUe13	46	IrUe	2012	open	29	2	27	0.07
IrUe13	46	IrUe	2013	open	43	0	43	0
IrUe13	46	IrUe	2013	open	62	4	58	0.06
IrUe13	46	IrUe	2013	open	37	6	31	0.16
IrUe11	45	IrUe	2012	open	42	0	42	0
IrUe11	45	IrUe	2012	open	77	0	77	0
IrUe11	45	IrUe	2012	open	27	6	21	0.22
IrUe11	45	IrUe	2013	open	42	2	40	0.05
IrUe11	45	IrUe	2013	open	64	6	58	0.09
IrUe11	45	IrUe	2013	open	37	4	33	0.11
IrUe10	44	IrUe	2013	open	68	1	67	0.01
IrUe10	44	IrUe	2013	open	81	3	78	0.04
IrUe10	44	IrUe	2013	open	42	4	38	0.1
IrUe1	43	IrUe	2012	open	45	0	45	0
IrUe1	43	IrUe	2012	open	93	5	88	0.05
IrUe1	43	IrUe	2012	open	71	8	63	0.11
IrSoPM9	42	IrSo	2012	open	16	0	16	0
IrSoPM9	42	IrSo	2012	open	13	0	13	0
IrSoPM9	42	IrSo	2012	open	32	0	32	0
IrSoPM8	41	IrSo	2012	open	31	1	30	0.03
IrSoPM8	41	IrSo	2012	open	45	3	42	0.07
IrSoPM8	41	IrSo	2012	open	51	7	44	0.14
IrSoPM7	40	IrSo	2012	open	91	0	91	0
IrSoPM7	40	IrSo	2012	open	55	0	55	0
IrSoPM7	40	IrSo	2012	open	60	0	60	0
IrSoPM6	39	IrSo	2012	open	115	0	115	0
IrSoPM6	39	IrSo	2012	open	106	5	101	0.05
IrSoPM6	39	IrSo	2012	open	149	14	135	0.09
IrSoPM4	38	IrSo	2012	open	36	0	36	0
IrSoPM4	38	IrSo	2012	open	42	0	42	0
IrSoPM4	38	IrSo	2012	open	69	0	69	0
IrSoPM33	36	IrSo	2012	open	54	0	54	0
IrSoPM32	35	IrSo	2012	open	34	0	34	0
IrSoPM32	35	IrSo	2012	open	36	0	36	0
IrSoPM32	35	IrSo	2012	open	47	0	47	0
IrSoPM31	34	IrSo	2012	open	27	0	27	0
IrSoPM31	34	IrSo	2012	open	31	0	31	0
IrSoPM31	34	IrSo	2012	open	32	2	30	0.06
IrSoPM20	32	IrSo	2012	open	32	2	30	0.06
IrSoPM20	32	IrSo	2012	open	52	6	46	0.12
IrSoPM20	32	IrSo	2012	open	25	4	21	0.16
IrSoPM2	31	IrSo	2012	open	55	1	54	0.02
IrSoPM2	31	IrSo	2012	open	36	1	35	0.03
IrSoPM2	31	IrSo	2012	open	33	1	32	0.03
IrSoPM18	30	IrSo	2012	open	11	0	11	0
IrSoPM18	30	IrSo	2012	open	21	1	20	0.05
IrSoPM18	30	IrSo	2012	open	43	4	39	0.09
IrSoPM17	29	IrSo	2012	open	38	0	38	0
IrSoPM17	29	IrSo	2012	open	61	1	60	0.02
IrSoPM17	29	IrSo	2012	open	61	8	53	0.13
IrSoPM16	28	IrSo	2012	open	34	2	32	0.06
IrSoPM16	28	IrSo	2012	open	32	2	30	0.06
IrSoPM16	28	IrSo	2012	open	45	5	40	0.11
IrSoPM15	27	IrSo	2012	open	79	3	76	0.04
IrSoPM15	27	IrSo	2012	open	59	3	56	0.05
IrSoPM15	27	IrSo	2012	open	72	26	46	0.36
IrSoPM14	26	IrSo	2012	open	51	2	49	0.04
IrSoPM14	26	IrSo	2012	open	34	12	22	0.35
IrSoPM14	26	IrSo	2012	open	49	18	31	0.37
IrSoPM13	25	IrSo	2012	open	46	0	46	0
IrSoPM13	25	IrSo	2012	open	27	2	25	0.07
IrSoPM13	25	IrSo	2012	open	30	8	22	0.27
IrSoPM12	24	IrSo	2012	open	62	13	49	0.21
IrSoPM12	24	IrSo	2012	open	34	10	24	0.29
IrSoPM12	24	IrSo	2012	open	36	13	23	0.36
IrSoPM11	23	IrSo	2012	open	68	0	68	0
IrSoPM11	23	IrSo	2012	open	30	0	30	0
IrSoPM11	23	IrSo	2012	open	65	0	65	0
IrSoPM10	22	IrSo	2012	open	58	0	58	0
IrSoPM10	22	IrSo	2012	open	96	9	87	0.09
IrSoPM10	22	IrSo	2012	open	63	6	57	0.1
IrSoPM1	21	IrSo	2012	open	61	0	61	0
IrSoPM1	21	IrSo	2012	open	91	0	91	0
IrSoPM1	21	IrSo	2012	open	78	0	78	0
IrSo9	20	IrSo	2013	open	64	1	63	0.02
IrSo9	20	IrSo	2013	open	73	3	70	0.04
IrSo9	20	IrSo	2013	open	39	3	36	0.08
IrSo8	19	IrSo	2013	open	64	0	64	0
IrSo8	19	IrSo	2013	open	74	0	74	0
IrSo8	19	IrSo	2013	open	89	2	87	0.02
IrSo7	18	IrSo	2013	open	100	0	100	0
IrSo7	18	IrSo	2013	open	77	0	77	0
IrSo7	18	IrSo	2013	open	92	0	92	0
IrSo6	17	IrSo	2013	open	111	0	111	0
IrSo6	17	IrSo	2013	open	95	0	95	0
IrSo6	17	IrSo	2013	open	50	1	49	0.02
IrSo5	16	IrSo	2013	open	48	0	48	0
IrSo5	16	IrSo	2013	open	61	1	60	0.02
IrSo5	16	IrSo	2013	open	45	1	44	0.02
IrSo32	14	IrSo	2013	open	72	0	72	0
IrSo32	14	IrSo	2013	open	46	0	46	0
IrSo32	14	IrSo	2013	open	78	1	77	0.01
IrSo31	13	IrSo	2013	open	44	0	44	0
IrSo31	13	IrSo	2013	open	28	0	28	0
IrSo31	13	IrSo	2013	open	21	0	21	0
IrSo20	12	IrSo	2013	open	27	0	27	0
IrSo20	12	IrSo	2013	open	28	0	28	0
IrSo2	11	IrSo	2013	open	106	0	106	0
IrSo2	11	IrSo	2013	open	65	0	65	0
IrSo2	11	IrSo	2013	open	91	0	91	0
IrSo18	10	IrSo	2013	open	30	0	30	0
IrSo18	10	IrSo	2013	open	42	1	41	0.02
IrSo18	10	IrSo	2013	open	27	1	26	0.04
IrSo17	9	IrSo	2013	open	48	0	48	0
IrSo17	9	IrSo	2013	open	43	3	40	0.07
IrSo17	9	IrSo	2013	open	18	2	16	0.11
IrSo16	8	IrSo	2013	open	44	5	39	0.11
IrSo16	8	IrSo	2013	open	36	10	26	0.28
IrSo16	8	IrSo	2013	open	41	14	27	0.34
IrSo16	8	IrSo	2013	open	22	0	22	0
IrSo15	7	IrSo	2013	open	106	0	106	0
IrSo15	7	IrSo	2013	open	86	0	86	0
IrSo15	7	IrSo	2013	open	85	5	80	0.06
IrSo14	6	IrSo	2013	open	97	3	94	0.03
IrSo14	6	IrSo	2013	open	97	9	88	0.09
IrSo14	6	IrSo	2013	open	113	11	102	0.1
IrSo13	5	IrSo	2013	open	57	0	57	0
IrSo13	5	IrSo	2013	open	58	3	55	0.05
IrSo13	5	IrSo	2013	open	61	7	54	0.11
IrSo12	4	IrSo	2013	open	48	1	47	0.02
IrSo12	4	IrSo	2013	open	62	10	52	0.16
IrSo12	4	IrSo	2013	open	58	13	45	0.22
IrSo11	3	IrSo	2013	open	68	0	68	0
IrSo11	3	IrSo	2013	open	54	0	54	0
IrSo11	3	IrSo	2013	open	46	0	46	0
IrSo10	2	IrSo	2013	open	82	2	80	0.02
IrSo10	2	IrSo	2013	open	96	3	93	0.03
IrSo10	2	IrSo	2013	open	76	3	73	0.04
IrSo1	1	IrSo	2013	open	116	0	116	0
IrSo1	1	IrSo	2013	open	97	0	97	0
IrSo1	1	IrSo	2013	open	70	0	70	0

## Sheet: F2
a_id	id	pop	year	treat	n_flower	n_fruit	non_fruit	fset
KP1	61	KP	2012	Bag	18	3	15	0.166667
KP12	66	KP	2012	Bag	40	0	40	0
KP16	94	KP	2012	Bag	25	0	25	0
KP17	95	KP	2012	Bag	31	0	31	0
KP19	96	KP	2012	Bag	98	0	98	0
KP20	97	KP	2012	Bag	70	0	70	0
KP21	98	KP	2012	Bag	162	0	162	0
KP22	99	KP	2012	Bag	40	0	40	0
KP3	102	KP	2012	Bag	17	0	17	0
KP4	104	KP	2012	Bag	102	2	100	0.0196078
KP8	105	KP	2012	Bag	60	0	60	0
OP1	106	OP	2012	Bag	44	0	44	0
OP10	107	OP	2012	Bag	61	0	61	0
OP11	108	OP	2012	Bag	49	4	45	0.0816327
OP12	116	OP	2012	Bag	33	1	32	0.030303
OP13	124	OP	2012	Bag	38	0	38	0
OP14	129	OP	2012	Bag	25	1	24	0.04
OP17	140	OP	2012	Bag	27	0	27	0
OP18	141	OP	2012	Bag	37	0	37	0
OP19	142	OP	2012	Bag	35	0	35	0
OP2	143	OP	2012	Bag	42	2	40	0.047619
OP20	144	OP	2012	Bag	27	0	27	0
OP21	145	OP	2012	Bag	22	1	21	0.0454545
OP3	146	OP	2012	Bag	7	0	7	0
OP4	151	OP	2012	Bag	25	1	24	0.04
OP5	159	OP	2012	Bag	48	0	48	0
OP7	162	OP	2012	Bag	73	0	73	0
OP8	163	OP	2012	Bag	31	0	31	0
OP9	164	OP	2012	Bag	18	0	18	0
Su1	167	Su	2012	Bag	70	0	70	0
Su10	168	Su	2012	Bag	70	0	70	0
Su11	169	Su	2012	Bag	32	0	32	0
Su12	174	Su	2012	Bag	40	3	37	0.075
Su13	176	Su	2012	Bag	59	0	59	0
Su15	177	Su	2012	Bag	40	0	40	0
Su6	201	Su	2012	Bag	23	0	23	0
Su7	206	Su	2012	Bag	21	0	21	0
Su8	207	Su	2012	Bag	47	0	47	0
Su9	208	Su	2012	Bag	42	0	42	0

## Sheet: F3
	a_id	id	pop	year	treat	n_flower	n_fruit	non_fruit	fset
1	Su9	208	Su	2012	open	54	6	48	0.11
2	Su9	208	Su	2012	open	62	9	53	0.15
3	Su9	208	Su	2012	open	78	16	62	0.21
4	Su8	207	Su	2012	open	73	4	69	0.05
5	Su8	207	Su	2012	open	70	5	65	0.07
6	Su8	207	Su	2012	open	103	17	86	0.17
7	Su61	203	Su	2012	open	78	15	63	0.19
8	Su61	203	Su	2012	open	54	12	42	0.22
9	Su61	203	Su	2012	open	71	22	49	0.31
10	Su54	196	Su	2012	open	63	0	63	0
11	Su54	196	Su	2012	open	68	1	67	0.01
12	Su54	196	Su	2012	open	65	3	62	0.05
13	Su52	195	Su	2012	open	69	14	55	0.2
14	Su52	195	Su	2012	open	61	15	46	0.25
15	Su52	195	Su	2012	open	66	30	36	0.45
16	Su41	193	Su	2012	open	63	0	63	0
17	Su41	193	Su	2012	open	130	14	116	0.11
18	Su41	193	Su	2012	open	54	6	48	0.11
19	Su26	189	Su	2012	open	51	0	51	0
20	Su26	189	Su	2012	open	70	0	70	0
21	Su26	189	Su	2012	open	49	0	49	0
22	Su24	188	Su	2012	open	33	0	33	0
23	Su24	188	Su	2012	open	34	0	34	0
24	Su24	188	Su	2012	open	82	1	81	0.01
25	Su22	187	Su	2012	open	32	0	32	0
26	Su22	187	Su	2012	open	47	4	43	0.09
27	Su22	187	Su	2012	open	53	5	48	0.09
28	Su18	184	Su	2012	open	59	23	36	0.39
29	Su18	184	Su	2012	open	55	29	26	0.53
30	Su18	184	Su	2012	open	25	15	10	0.6
31	Su1504	181	Su	2012	open	60	24	36	0.4
32	Su1504	181	Su	2012	open	81	34	47	0.42
33	Su1504	181	Su	2012	open	94	56	38	0.6
34	Su1503	180	Su	2012	open	65	0	65	0
35	Su1503	180	Su	2012	open	57	0	57	0
36	Su1503	180	Su	2012	open	68	2	66	0.03
37	Su1502	179	Su	2012	open	67	0	67	0
38	Su1502	179	Su	2012	open	62	1	61	0.02
39	Su1502	179	Su	2012	open	53	1	52	0.02
40	Su1501	178	Su	2012	open	73	12	61	0.16
41	Su1501	178	Su	2012	open	76	18	58	0.24
42	Su1501	178	Su	2012	open	86	24	62	0.28
43	Su1231	175	Su	2012	open	20	0	20	0
44	Su1231	175	Su	2012	open	130	0	130	0
45	Su1231	175	Su	2012	open	106	0	106	0
46	Su12	174	Su	2012	open	153	25	128	0.16
47	Su12	174	Su	2012	open	137	28	109	0.2
48	Su12	174	Su	2012	open	42	26	16	0.62
49	Su1182	173	Su	2012	open	69	8	61	0.12
50	Su1182	173	Su	2012	open	68	8	60	0.12
51	Su1182	173	Su	2012	open	51	12	39	0.24
52	Su1180	172	Su	2012	open	42	20	22	0.48
53	Su1180	172	Su	2012	open	77	45	32	0.58
54	Su1180	172	Su	2012	open	49	37	12	0.76
55	Su1171	171	Su	2012	open	49	0	49	0
56	Su1171	171	Su	2012	open	43	0	43	0
57	Su1171	171	Su	2012	open	60	10	50	0.17
58	Su1170	170	Su	2012	open	81	0	81	0
59	Su1170	170	Su	2012	open	86	0	86	0
60	Su1170	170	Su	2012	open	89	0	89	0
61	OP8	163	OP	2012	open	50	1	49	0.02
62	OP8	163	OP	2012	open	32	5	27	0.16
63	OP8	163	OP	2012	open	26	2	24	0.08
64	OP7	162	OP	2012	open	154	26	128	0.17
65	OP7	162	OP	2012	open	117	16	101	0.14
66	OP7	162	OP	2012	open	61	14	47	0.23
67	OP67	161	OP	2012	open	63	0	63	0
68	OP67	161	OP	2012	open	52	3	49	0.06
69	OP67	161	OP	2012	open	78	2	76	0.03
70	OP45	155	OP	2012	open	54	21	33	0.39
71	OP45	155	OP	2012	open	70	32	38	0.46
72	OP45	155	OP	2012	open	67	0	67	0
73	OP42	153	OP	2012	open	56	4	52	0.07
74	OP42	153	OP	2012	open	61	10	51	0.16
75	OP42	153	OP	2012	open	52	0	52	0
76	OP41	152	OP	2012	open	45	9	36	0.2
77	OP41	152	OP	2012	open	62	6	56	0.1
78	OP41	152	OP	2012	open	58	1	57	0.02
79	OP35	148	OP	2012	open	31	10	21	0.32
80	OP35	148	OP	2012	open	87	1	86	0.01
81	OP35	148	OP	2012	open	71	2	69	0.03
82	OP33	147	OP	2012	open	36	0	36	0
83	OP33	147	OP	2012	open	49	0	49	0
84	OP33	147	OP	2012	open	65	0	65	0
85	OP1510	138	OP	2012	open	70	12	58	0.17
86	OP1510	138	OP	2012	open	43	2	41	0.05
87	OP1510	138	OP	2012	open	78	3	75	0.04
88	OP1472	134	OP	2012	open	41	1	40	0.02
89	OP1472	134	OP	2012	open	30	9	21	0.3
90	OP1472	134	OP	2012	open	29	0	29	0
91	OP1452	132	OP	2012	open	34	0	34	0
92	OP1452	132	OP	2012	open	12	0	12	0
93	OP1452	132	OP	2012	open	57	9	48	0.16
94	OP14	129	OP	2012	open	35	4	31	0.11
95	OP14	129	OP	2012	open	44	2	42	0.05
96	OP14	129	OP	2012	open	64	0	64	0
97	OP1302	126	OP	2012	open	78	1	77	0.01
98	OP1302	126	OP	2012	open	114	3	111	0.03
99	OP1302	126	OP	2012	open	57	2	55	0.04
100	OP12xx	123	OP	2012	open	34	0	34	0
101	OP12xx	123	OP	2012	open	45	0	45	0
102	OP12xx	123	OP	2012	open	31	8	23	0.26
103	OP1244	121	OP	2012	open	54	7	47	0.13
104	OP1244	121	OP	2012	open	96	16	80	0.17
105	OP1244	121	OP	2012	open	67	2	65	0.03
106	OP12-04	119	OP	2012	open	48	8	40	0.17
107	OP12-04	119	OP	2012	open	65	15	50	0.23
108	OP12-04	119	OP	2012	open	44	2	42	0.05
109	OP12-03	118	OP	2012	open	23	5	18	0.22
110	OP12-03	118	OP	2012	open	42	3	39	0.07
111	OP12-03	118	OP	2012	open	33	9	24	0.27
112	OP12-02	117	OP	2012	open	49	2	47	0.04
113	OP12-02	117	OP	2012	open	52	0	52	0
114	OP12-02	117	OP	2012	open	63	3	60	0.05
115	OP1134	115	OP	2012	open	81	0	81	0
116	OP1134	115	OP	2012	open	94	1	93	0.01
117	OP1134	115	OP	2012	open	80	1	79	0.01
118	OP1133	114	OP	2012	open	60	11	49	0.18
119	OP1133	114	OP	2012	open	84	5	79	0.06
120	OP1133	114	OP	2012	open	77	1	76	0.01
121	OP1126	112	OP	2012	open	37	2	35	0.05
122	OP1126	112	OP	2012	open	38	0	38	0
123	OP1126	112	OP	2012	open	59	0	59	0
124	OP1125	111	OP	2012	open	53	0	53	0
125	OP1125	111	OP	2012	open	28	0	28	0
126	OP1125	111	OP	2012	open	29	0	29	0
127	OP1	106	OP	2012	open	45	3	42	0.07
128	OP1	106	OP	2012	open	57	4	53	0.07
129	OP1	106	OP	2012	open	45	0	45	0
130	KP1549	90	KP	2012	open	196	0	196	0
131	KP1549	90	KP	2012	open	75	0	75	0
132	KP1549	90	KP	2012	open	123	21	102	0.17
133	KP1543	86	KP	2012	open	80	0	80	0
134	KP1543	86	KP	2012	open	123	2	121	0.02
135	KP12_17	83	KP	2012	open	282	0	282	0
136	KP12_17	83	KP	2012	open	83	8	75	0.1
137	KP12_17	83	KP	2012	open	188	32	156	0.17
138	KP12_16	82	KP	2012	open	88	0	88	0
139	KP12_16	82	KP	2012	open	60	5	55	0.08
140	KP12_16	82	KP	2012	open	86	17	69	0.2
141	KP12_15(1105)	81	KP	2012	open	55	0	55	0
142	KP12_15(1105)	81	KP	2012	open	99	8	91	0.08
143	KP12_15(1105)	81	KP	2012	open	108	13	95	0.12
144	KP12_14(1105)	80	KP	2012	open	128	0	128	0
145	KP12_14(1105)	80	KP	2012	open	80	1	79	0.01
146	KP12_14(1105)	80	KP	2012	open	93	5	88	0.05
147	KP12_13	79	KP	2012	open	60	0	60	0
148	KP12_13	79	KP	2012	open	109	0	109	0
149	KP12_13	79	KP	2012	open	71	0	71	0
150	KP12_12	78	KP	2012	open	107	0	107	0
151	KP12_12	78	KP	2012	open	119	1	118	0.01
152	KP12_12	78	KP	2012	open	105	4	101	0.04
153	KP12_11	77	KP	2012	open	87	0	87	0
154	KP12_11	77	KP	2012	open	109	8	101	0.07
155	KP12_10	76	KP	2012	open	67	0	67	0
156	KP12_10	76	KP	2012	open	76	4	72	0.05
157	KP12_10	76	KP	2012	open	85	15	70	0.18
158	KP12_09	75	KP	2012	open	104	0	104	0
159	KP12_09	75	KP	2012	open	54	2	52	0.04
160	KP12_09	75	KP	2012	open	138	6	132	0.04
161	KP12_08	74	KP	2012	open	93	1	92	0.01
162	KP12_08	74	KP	2012	open	120	7	113	0.06
163	KP12_08	74	KP	2012	open	89	7	82	0.08
164	KP12_07	73	KP	2012	open	131	1	130	0.01
165	KP12_07	73	KP	2012	open	79	2	77	0.03
166	KP12_07	73	KP	2012	open	33	6	27	0.18
167	KP12_06	72	KP	2012	open	110	3	107	0.03
168	KP12_06	72	KP	2012	open	109	4	105	0.04
169	KP12_06	72	KP	2012	open	66	12	54	0.18
170	KP12_05	71	KP	2012	open	92	0	92	0
171	KP12_05	71	KP	2012	open	95	15	80	0.16
172	KP12_04	70	KP	2012	open	113	0	113	0
173	KP12_04	70	KP	2012	open	152	1	151	0.01
174	KP12_04	70	KP	2012	open	130	17	113	0.13
175	KP12_03	69	KP	2012	open	121	0	121	0
176	KP12_03	69	KP	2012	open	159	6	153	0.04
177	KP12_03	69	KP	2012	open	167	55	112	0.33
178	KP12_02	68	KP	2012	open	68	0	68	0
179	KP12_02	68	KP	2012	open	135	0	135	0
180	KP12_02	68	KP	2012	open	85	4	81	0.05
181	KP12_01	67	KP	2012	open	97	0	97	0
182	KP12_01	67	KP	2012	open	250	0	250	0
183	KP12_01	67	KP	2012	open	113	0	113	0
184	KP1131	65	KP	2012	open	47	3	44	0.06
185	KP1131	65	KP	2012	open	53	12	41	0.23
186	KP1130	64	KP	2012	open	110	0	110	0
187	KP1130	64	KP	2012	open	54	2	52	0.04
188	KP1104	62	KP	2012	open	64	8	56	0.13
189	KP	60	KP	2012	open	163	1	162	0.01
190	KP	60	KP	2012	open	82	8	74	0.1
191	IrUe9	59	IrUe	2012	open	36	0	36	0
192	IrUe9	59	IrUe	2012	open	36	0	36	0
193	IrUe9	59	IrUe	2012	open	17	0	17	0
194	IrUe8	58	IrUe	2012	open	35	0	35	0
195	IrUe8	58	IrUe	2012	open	19	0	19	0
196	IrUe8	58	IrUe	2012	open	25	0	25	0
197	IrUe6＊	57	IrUe	2012	open	67	0	67	0
198	IrUe6＊	57	IrUe	2012	open	47	0	47	0
199	IrUe6＊	57	IrUe	2012	open	40	0	40	0
200	IrUe5	56	IrUe	2012	open	51	0	51	0
201	IrUe5	56	IrUe	2012	open	46	6	40	0.13
202	IrUe5	56	IrUe	2012	open	28	5	23	0.18
203	IrUe4	55	IrUe	2012	open	74	0	74	0
204	IrUe4	55	IrUe	2012	open	56	0	56	0
205	IrUe4	55	IrUe	2012	open	81	0	81	0
206	IrUe3	52	IrUe	2012	open	54	0	54	0
207	IrUe3	52	IrUe	2012	open	56	0	56	0
208	IrUe3	52	IrUe	2012	open	33	2	31	0.06
209	IrUe2	51	IrUe	2012	open	38	0	38	0
210	IrUe2	51	IrUe	2012	open	57	0	57	0
211	IrUe2	51	IrUe	2012	open	53	0	53	0
212	IrUe18	50	IrUe	2012	open	17	0	17	0
213	IrUe18	50	IrUe	2012	open	39	0	39	0
214	IrUe18	50	IrUe	2012	open	40	0	40	0
215	IrUe17	49	IrUe	2012	open	55	0	55	0
216	IrUe17	49	IrUe	2012	open	51	0	51	0
217	IrUe17	49	IrUe	2012	open	94	4	90	0.04
218	IrUe16	48	IrUe	2012	open	52	0	52	0
219	IrUe16	48	IrUe	2012	open	77	0	77	0
220	IrUe16	48	IrUe	2012	open	45	0	45	0
221	IrUe15	47	IrUe	2012	open	100	0	100	0
222	IrUe15	47	IrUe	2012	open	108	0	108	0
223	IrUe15	47	IrUe	2012	open	59	0	59	0
224	IrUe13	46	IrUe	2012	open	27	0	27	0
225	IrUe13	46	IrUe	2012	open	38	1	37	0.03
226	IrUe13	46	IrUe	2012	open	29	2	27	0.07
227	IrUe11	45	IrUe	2012	open	42	0	42	0
228	IrUe11	45	IrUe	2012	open	77	0	77	0
229	IrUe11	45	IrUe	2012	open	27	6	21	0.22
230	IrUe1	43	IrUe	2012	open	45	0	45	0
231	IrUe1	43	IrUe	2012	open	93	5	88	0.05
232	IrUe1	43	IrUe	2012	open	71	8	63	0.11
233	IrSoPM9	42	IrSo	2012	open	16	0	16	0
234	IrSoPM9	42	IrSo	2012	open	13	0	13	0
235	IrSoPM9	42	IrSo	2012	open	32	0	32	0
236	IrSoPM8	41	IrSo	2012	open	31	1	30	0.03
237	IrSoPM8	41	IrSo	2012	open	45	3	42	0.07
238	IrSoPM8	41	IrSo	2012	open	51	7	44	0.14
239	IrSoPM7	40	IrSo	2012	open	91	0	91	0
240	IrSoPM7	40	IrSo	2012	open	55	0	55	0
241	IrSoPM7	40	IrSo	2012	open	60	0	60	0
242	IrSoPM6	39	IrSo	2012	open	115	0	115	0
243	IrSoPM6	39	IrSo	2012	open	106	5	101	0.05
244	IrSoPM6	39	IrSo	2012	open	149	14	135	0.09
245	IrSoPM4	38	IrSo	2012	open	36	0	36	0
246	IrSoPM4	38	IrSo	2012	open	42	0	42	0
247	IrSoPM4	38	IrSo	2012	open	69	0	69	0
248	IrSoPM33	36	IrSo	2012	open	54	0	54	0
249	IrSoPM32	35	IrSo	2012	open	34	0	34	0
250	IrSoPM32	35	IrSo	2012	open	36	0	36	0
251	IrSoPM32	35	IrSo	2012	open	47	0	47	0
252	IrSoPM31	34	IrSo	2012	open	27	0	27	0
253	IrSoPM31	34	IrSo	2012	open	31	0	31	0
254	IrSoPM31	34	IrSo	2012	open	32	2	30	0.06
255	IrSoPM20	32	IrSo	2012	open	32	2	30	0.06
256	IrSoPM20	32	IrSo	2012	open	52	6	46	0.12
257	IrSoPM20	32	IrSo	2012	open	25	4	21	0.16
258	IrSoPM2	31	IrSo	2012	open	55	1	54	0.02
259	IrSoPM2	31	IrSo	2012	open	36	1	35	0.03
260	IrSoPM2	31	IrSo	2012	open	33	1	32	0.03
261	IrSoPM18	30	IrSo	2012	open	11	0	11	0
262	IrSoPM18	30	IrSo	2012	open	21	1	20	0.05
263	IrSoPM18	30	IrSo	2012	open	43	4	39	0.09
264	IrSoPM17	29	IrSo	2012	open	38	0	38	0
265	IrSoPM17	29	IrSo	2012	open	61	1	60	0.02
266	IrSoPM17	29	IrSo	2012	open	61	8	53	0.13
267	IrSoPM16	28	IrSo	2012	open	34	2	32	0.06
268	IrSoPM16	28	IrSo	2012	open	32	2	30	0.06
269	IrSoPM16	28	IrSo	2012	open	45	5	40	0.11
270	IrSoPM15	27	IrSo	2012	open	79	3	76	0.04
271	IrSoPM15	27	IrSo	2012	open	59	3	56	0.05
272	IrSoPM15	27	IrSo	2012	open	72	26	46	0.36
273	IrSoPM14	26	IrSo	2012	open	51	2	49	0.04
274	IrSoPM14	26	IrSo	2012	open	34	12	22	0.35
275	IrSoPM14	26	IrSo	2012	open	49	18	31	0.37
276	IrSoPM13	25	IrSo	2012	open	46	0	46	0
277	IrSoPM13	25	IrSo	2012	open	27	2	25	0.07
278	IrSoPM13	25	IrSo	2012	open	30	8	22	0.27
279	IrSoPM12	24	IrSo	2012	open	62	13	49	0.21
280	IrSoPM12	24	IrSo	2012	open	34	10	24	0.29
281	IrSoPM12	24	IrSo	2012	open	36	13	23	0.36
282	IrSoPM11	23	IrSo	2012	open	68	0	68	0
283	IrSoPM11	23	IrSo	2012	open	30	0	30	0
284	IrSoPM11	23	IrSo	2012	open	65	0	65	0
285	IrSoPM10	22	IrSo	2012	open	58	0	58	0
286	IrSoPM10	22	IrSo	2012	open	96	9	87	0.09
287	IrSoPM10	22	IrSo	2012	open	63	6	57	0.1
288	IrSoPM1	21	IrSo	2012	open	61	0	61	0
289	IrSoPM1	21	IrSo	2012	open	91	0	91	0
290	IrSoPM1	21	IrSo	2012	open	78	0	78	0
291	KP1	61	KP	2012	Bag	18	3	15	0.166667
292	KP12	66	KP	2012	Bag	40	0	40	0
293	KP16	94	KP	2012	Bag	25	0	25	0
294	KP17	95	KP	2012	Bag	31	0	31	0
295	KP19	96	KP	2012	Bag	98	0	98	0
296	KP20	97	KP	2012	Bag	70	0	70	0
297	KP21	98	KP	2012	Bag	162	0	162	0
298	KP22	99	KP	2012	Bag	40	0	40	0
299	KP3	102	KP	2012	Bag	17	0	17	0
300	KP4	104	KP	2012	Bag	102	2	100	0.0196078
301	KP8	105	KP	2012	Bag	60	0	60	0
302	OP1	106	OP	2012	Bag	44	0	44	0
303	OP10	107	OP	2012	Bag	61	0	61	0
304	OP11	108	OP	2012	Bag	49	4	45	0.0816327
305	OP12	116	OP	2012	Bag	33	1	32	0.030303
306	OP13	124	OP	2012	Bag	38	0	38	0
307	OP14	129	OP	2012	Bag	25	1	24	0.04
308	OP17	140	OP	2012	Bag	27	0	27	0
309	OP18	141	OP	2012	Bag	37	0	37	0
310	OP19	142	OP	2012	Bag	35	0	35	0
311	OP2	143	OP	2012	Bag	42	2	40	0.047619
312	OP20	144	OP	2012	Bag	27	0	27	0
313	OP21	145	OP	2012	Bag	22	1	21	0.0454545
314	OP3	146	OP	2012	Bag	7	0	7	0
315	OP4	151	OP	2012	Bag	25	1	24	0.04
316	OP5	159	OP	2012	Bag	48	0	48	0
317	OP7	162	OP	2012	Bag	73	0	73	0
318	OP8	163	OP	2012	Bag	31	0	31	0
319	OP9	164	OP	2012	Bag	18	0	18	0
320	Su1	167	Su	2012	Bag	70	0	70	0
321	Su10	168	Su	2012	Bag	70	0	70	0
322	Su11	169	Su	2012	Bag	32	0	32	0
323	Su12	174	Su	2012	Bag	40	3	37	0.075
324	Su13	176	Su	2012	Bag	59	0	59	0
325	Su15	177	Su	2012	Bag	40	0	40	0
326	Su6	201	Su	2012	Bag	23	0	23	0
327	Su7	206	Su	2012	Bag	21	0	21	0
328	Su8	207	Su	2012	Bag	47	0	47	0
329	Su9	208	Su	2012	Bag	42	0	42	0

[truncated: 3 more sheets: G, H, I]
