# Supplementary material for: Polygamous breeding system identified in the distylous genus Psychotria : P. manillensis in the Ryukyu archipelago, Japan
Source: PeerJ journal article supplement (doi:10.7717/peerj.12318), 2021-11-10
Supplement: TableS1.pdf [file TableS1.pdf]

Table S1. Fruit set of *Psychotria manillensis* in five populations of Okinawa and Iriomote Islands, Japan.

|                           | Population    | N  | N  | n    | Fruit set (%) | Percentage of fruiting plants |
|---------------------------|---------------|----|----|------|---------------|-------------------------------|
| <b>Open pollination</b>   |               |    |    |      |               |                               |
| <b>2011</b>               | Okinawa Isl.  |    |    |      |               |                               |
|                           | Sueyoshi      | 20 | 60 | 3138 | 12.5          | 100                           |
|                           | Katsuu        | 17 | 51 | 1828 | 21.9          | 100                           |
|                           | Oppa          | 33 | 99 | 4719 | 19.8          | 88.0                          |
| <b>2012</b>               | Okinawa Isl.  |    |    |      |               |                               |
|                           | Sueyoshi      | 20 | 60 | 4066 | 16.2          | 95.0                          |
|                           | Katsuu        | 23 | 61 | 6418 | 5.1           | 95.2                          |
|                           | Oppa          | 23 | 69 | 3896 | 8.2           | 95.7                          |
|                           | Iriomote Isl. |    |    |      |               |                               |
|                           | Sonai         | 20 | 58 | 2940 | 6.6           | 70.0                          |
|                           | Uehara        | 14 | 42 | 2135 | 1.8           | 64.3                          |
| <b>2013</b>               | Okinawa Isl.  |    |    |      |               |                               |
|                           | Sueyoshi      | 23 | 69 | 5064 | 6.9           | 100.0                         |
|                           | Katsuu        | 25 | 75 | 9061 | 12.0          | 100.0                         |
|                           | Oppa          | 22 | 66 | 6370 | 4.6           | 100.0                         |
|                           | Iriomote Isl. |    |    |      |               |                               |
|                           | Sonai         | 21 | 63 | 3818 | 3.3           | 95.2                          |
|                           | Uehara        | 13 | 39 | 1998 | 2.2           | 76.9                          |
| <b>Bagging experiment</b> |               |    |    |      |               |                               |
| <b>2012</b>               | Okinawa Isl.  |    |    |      |               |                               |
|                           | Sueyoshi      | 10 | 10 | 444  | 0.68          | -                             |
|                           | Katsuu        | 11 | 11 | 663  | 0.75          | -                             |
|                           | Oppa          | 18 | 18 | 642  | 1.56          |                               |

N, number of plants

N, number of inflorescence

n, number of flowers
