# Supplementary material for: Polygamous breeding system identified in the distylous genus Psychotria : P. manillensis in the Ryukyu archipelago, Japan
Source: PeerJ journal article supplement (doi:10.7717/peerj.12318), 2021-11-10
Supplement: TableS2.pdf [file TableS2.pdf]

Table S2. AIC of GLMM (logit-link, binomial distribution) and results of maximum likelihood test (chi-square) between models.

| Models                                               | Responsible variable | Fixed variable         | Random effect          | AIC  | Maximum likelihood test between models |         |
|------------------------------------------------------|----------------------|------------------------|------------------------|------|----------------------------------------|---------|
|                                                      |                      |                        |                        |      | Chisq                                  | P value |
| Fruit set after cross pollination                    |                      |                        |                        |      |                                        |         |
| model.0                                              | fruit set            | none                   | plant id               | 249  | 102.07                                 | <0.0001 |
| model.1                                              | fruit set            | stigma types           | plant id               | 151  |                                        |         |
| Fruit set after self- and cross polination           |                      |                        |                        |      |                                        |         |
| model.0                                              | fruit set            | none                   | plant id + stigma type | 257  | 32.21                                  | <0.0001 |
| model.1                                              | fruit set            | treatment (cross/self) | plant id + stigma type | 227  |                                        |         |
| Fruit set under open pollination                     |                      |                        |                        |      |                                        |         |
| model.0                                              | fruit set            | none                   | plant id               | 6953 |                                        |         |
| model.1                                              | fruit set            | year                   | plant id               | 6809 |                                        |         |
| model.2                                              | fruit set            | population             | plant id               | 6914 |                                        |         |
| model.3                                              | fruit set            | year + population      | plant id               | 6780 |                                        |         |
| Fruit set after bagging and open pollination in 2012 |                      |                        |                        |      |                                        |         |
| model.0                                              | fruit set            | none                   | plant id / population  | 2113 | 73.74                                  | <0.0001 |
| model.1                                              | fruit set            | treatment (bag/open)   | plant id / population  | 2041 |                                        |         |
