# Supplementary material for: Polygamous breeding system identified in the distylous genus Psychotria : P. manillensis in the Ryukyu archipelago, Japan
Source: PeerJ journal article supplement (doi:10.7717/peerj.12318), 2021-11-10
Supplement: TableS3.pdf [file TableS3.pdf]

Table S3. Flower visitors of *Psychotria manillensis* on Okinawa and Iriomote Islands, the Ryukyu Islands, Japan, in 2011-2013.

| Family             | Species                              | Population |    |    |          |    |
|--------------------|--------------------------------------|------------|----|----|----------|----|
|                    |                                      | Okinawa    |    |    | Iriomote |    |
|                    |                                      | Kt         | Op | Su | Ue       | So |
| <b>HYMENOPTERA</b> |                                      |            |    |    |          |    |
| Apidae             | <i>Amegilla dulcifera</i>            |            | 1  | 1  |          |    |
|                    | <i>A. florea</i>                     |            |    |    |          | 5  |
|                    | <i>Apis mellifera</i>                | 2          | 2  |    |          |    |
| Halictidae         | <i>Lasioglossum</i> sp.              | 1          | 2  | 4  |          |    |
| Icheumonidae       | sp.                                  |            | 1  |    |          |    |
| Scoliidae          | <i>Megacampsomeris prismatica</i>    |            |    | 1  |          |    |
| Vespidae           | <i>Anterhynchium flavomarginatum</i> | 1          |    |    |          |    |
|                    | <i>Pararrhynchium ishigakiense</i>   |            |    |    |          | 1  |
|                    | <i>Polistes formosanus</i>           |            |    |    | 22       | 16 |
|                    | <i>P. rothneyi</i>                   | 23         | 26 | 59 | 32       | 26 |
|                    | <i>Vespa affinis</i>                 |            |    |    | 7        | 7  |
|                    | <i>V. analis</i>                     | 33         | 29 | 1  | 31       | 22 |
|                    | <i>V. ducalis</i>                    |            |    |    | 7        | 5  |
| <b>DIPTERA</b>     |                                      |            |    |    |          |    |
| Ephydriidae        | sp.                                  | 1          |    |    |          |    |
| Calliphoridae      | <i>Hemipyrellia</i> sp.              | 2          |    |    | 1        |    |
|                    | <i>Lucilia papuensis</i>             | 1          |    |    | 1        |    |
|                    | <i>L. porphyrina</i>                 | 12         | 22 | 10 | 9        | 4  |
| Muscidae           | <i>Dichaetomyia flavipolis</i>       | 3          | 7  | 5  |          |    |
|                    | <i>D. watasei</i>                    | 3          | 1  |    |          |    |
|                    | <i>Stomoxys calcitrans</i>           | 1          |    |    |          |    |
| Sarcophagidae      | <i>Sarcophaga antilope</i>           |            | 1  |    |          |    |
|                    | <i>S. kanakovi</i>                   |            | 1  |    |          |    |
|                    | sp.                                  | 1          |    |    |          |    |
| Syrphidae          | <i>Allobaccha nubilipennis</i>       | 16         | 3  | 1  | 1        |    |
|                    | sp.                                  |            | 2  |    |          |    |
| Tachinidae         | sp.                                  |            | 1  |    |          |    |
| <b>LEPIDOPTERA</b> |                                      |            |    |    |          |    |
| Crambidae          | sp. 1                                |            | 1  |    |          |    |
|                    | sp. 2                                |            | 2  |    |          |    |
|                    | sp. 3                                |            | 1  |    |          |    |
| Lycaenidae         | <i>Lampides boeticus</i>             | 1          |    |    |          |    |
| Nymphalidae        | <i>Athyma perius</i>                 |            | 1  |    |          |    |
| Papilionidae       | <i>Papilio memnon</i>                | 2          |    |    |          |    |
|                    | <i>Papilio okinawaensis</i>          | 1          |    |    |          |    |
|                    | <i>Papilio polytes</i>               | 4          | 1  |    |          |    |
| Sphingidae         | <i>Macroglossum pyrrhosticta</i>     |            | 2  |    |          |    |
| <b>COLEOPTERA</b>  |                                      |            |    |    |          |    |
| Chrysomelidae      | <i>Altica cyanea</i>                 | 1          |    |    |          |    |
| <b>HEMIPTERA</b>   |                                      |            |    |    |          |    |
| Largidae           | <i>Physopelta cincticollis</i>       |            | 1  |    |          |    |
| <b>ORTHOPTERA</b>  |                                      |            |    |    |          |    |
| Gryllidae          | <i>Cardiodactylus guttulus</i>       | 1          | 1  |    | 1        | 1  |
|                    | <i>Gryllodes sigillatus</i>          |            |    |    |          | 2  |

Number of visits to an inflorescence during an 8-h observation are shown. Kt, Katsuu population; Op, Oppa population; Su, Sueyoshi population; Ue, Uehara population; So, Sonai population. Observations were performed on July 17 and 18, 2011 and on July 14 and 20, 2012 in the Katsuu population; from July 6 to September 18, 2011 and on July 14, 2012 in the Oppa population; on July 9 and 27, 2011, on June 19 and July 1, 2012 in the Sueyoshi population; and on June 2, 3, 15, 16, and 17, 2011 and on June 13, 2013 in the Sonai and Uehara populations.
